# Supplementary material for: Silica boron–sulfuric acid nanoparticles (SBSANs): preparation, characterization and their catalytic application in the Ritter reaction for the synthesis of amide derivatives
Source: Royal Society of Chemistry journal article supplement (doi:10.1039/c1jm11154j), 2011-01-01

Supporting Information for:

**Silica Boron-sulfuric Acid Nanoparticles (SBSANs):  
Preparation, Characterization and Their Catalytic  
Application in “Ritter Reaction” for Synthesis of Amide  
Derivatives**

*Ali Khalafi-Nezhad,\*<sup>a</sup> Habib ollah Foroughi,<sup>a</sup> Mohammad Mahdi Doroodmand,<sup>a,b</sup>  
Farhad Panahi\*<sup>a</sup>*

---

\*Corresponding author:

Tel.: +98-711-2282380

Fax: +98-711- 2280926

E-mail: khalafi@chem.susc.ac.ir

panahi@shirazu.ac.ir

<sup>a</sup> Department of Chemistry, Shiraz University, Shiraz, Iran

<sup>b</sup> Nanotechnology Research Institute, Shiraz University, Shiraz, Iran



Expand:

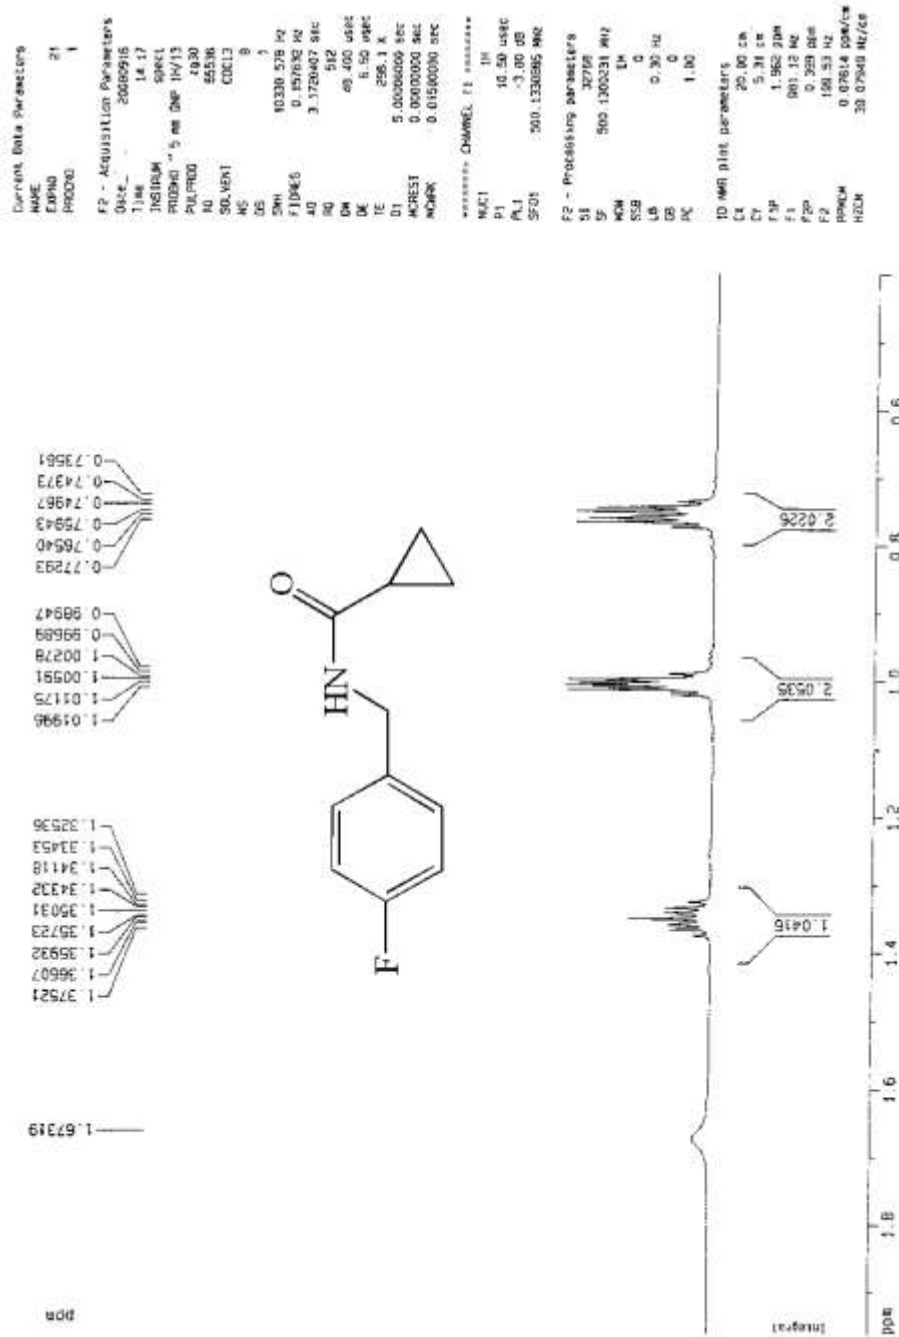

<sup>13</sup>CNMR

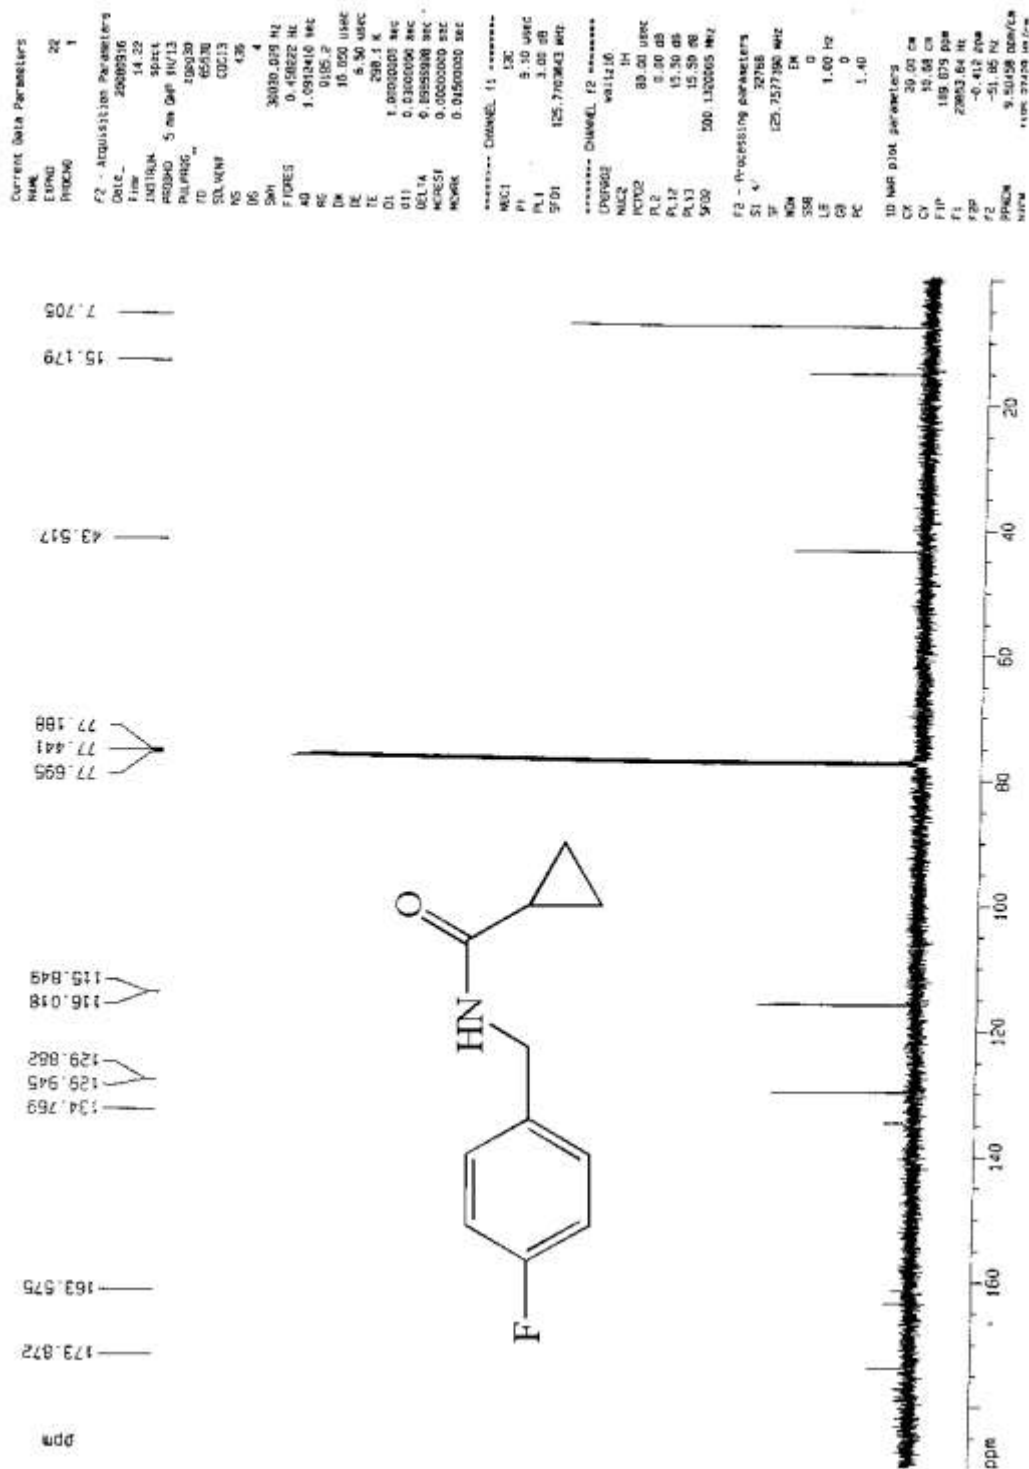

IR:

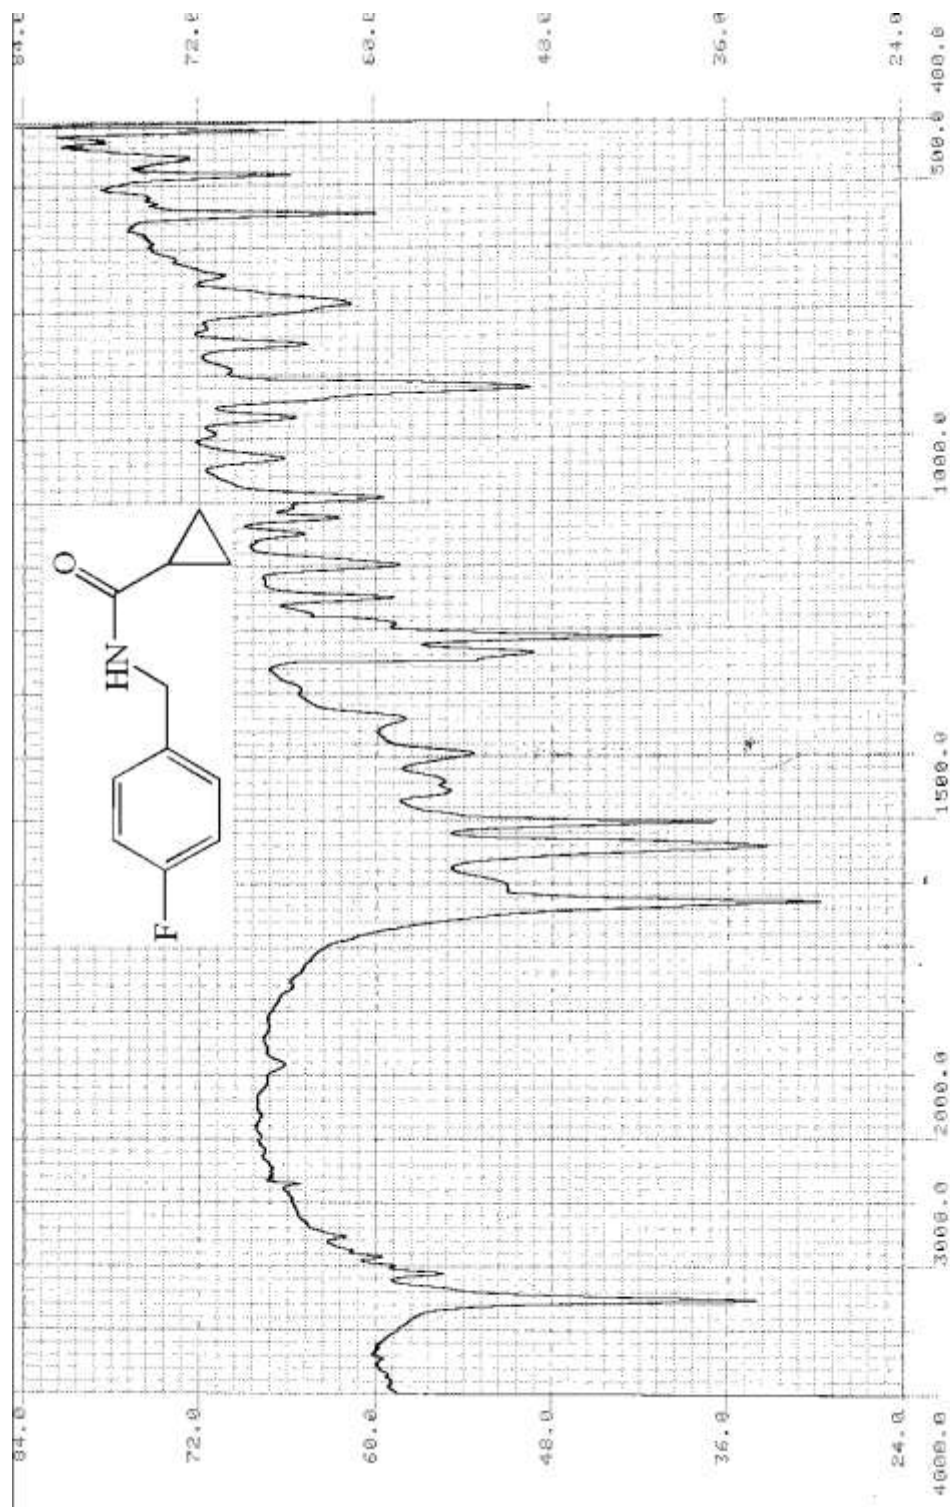

SHIMADZU CORPORATION CHART 200-91527

SHIMADZU CORPORATION CHART 200



Expand:

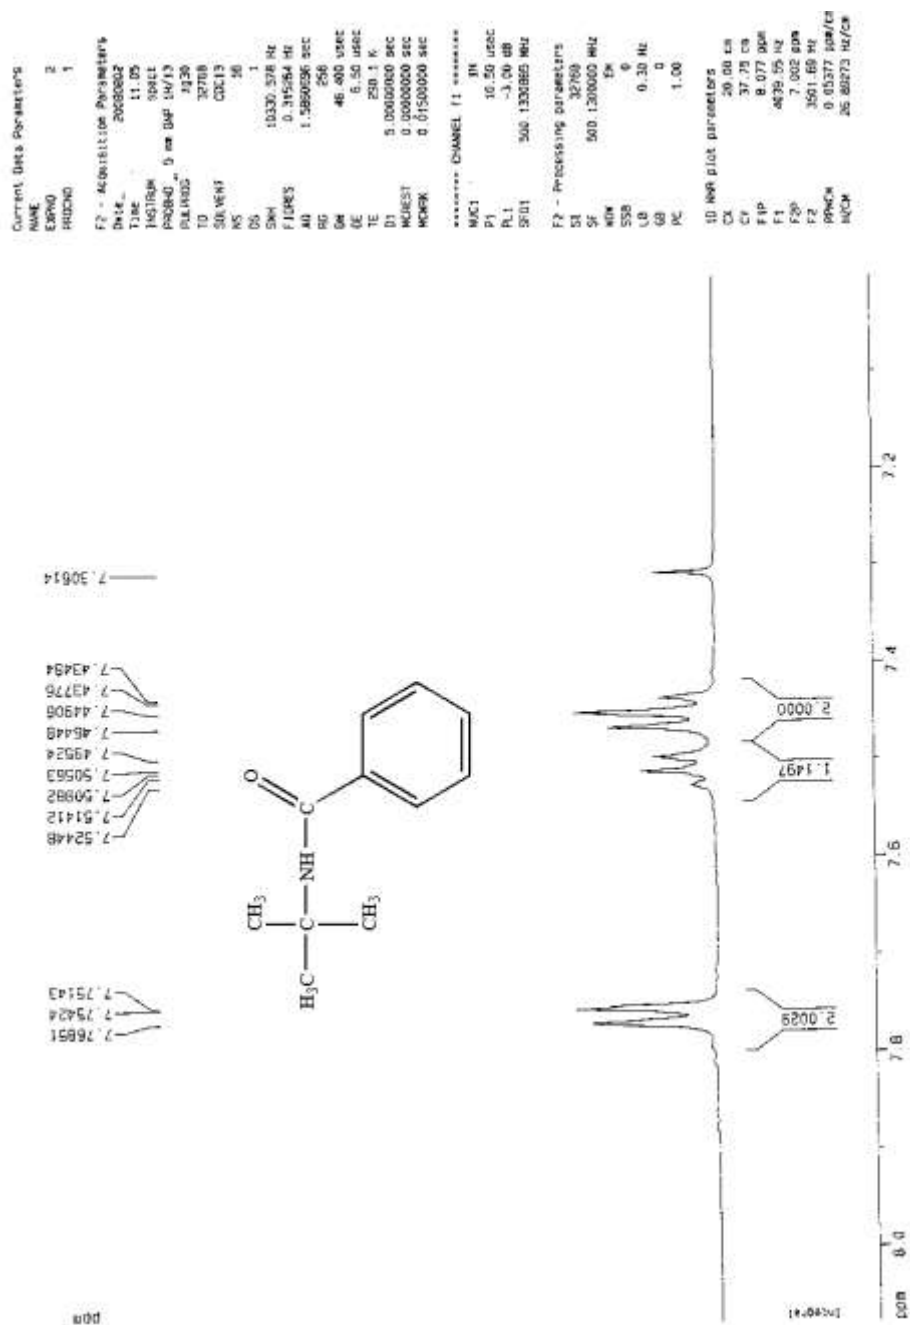



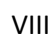



IR:

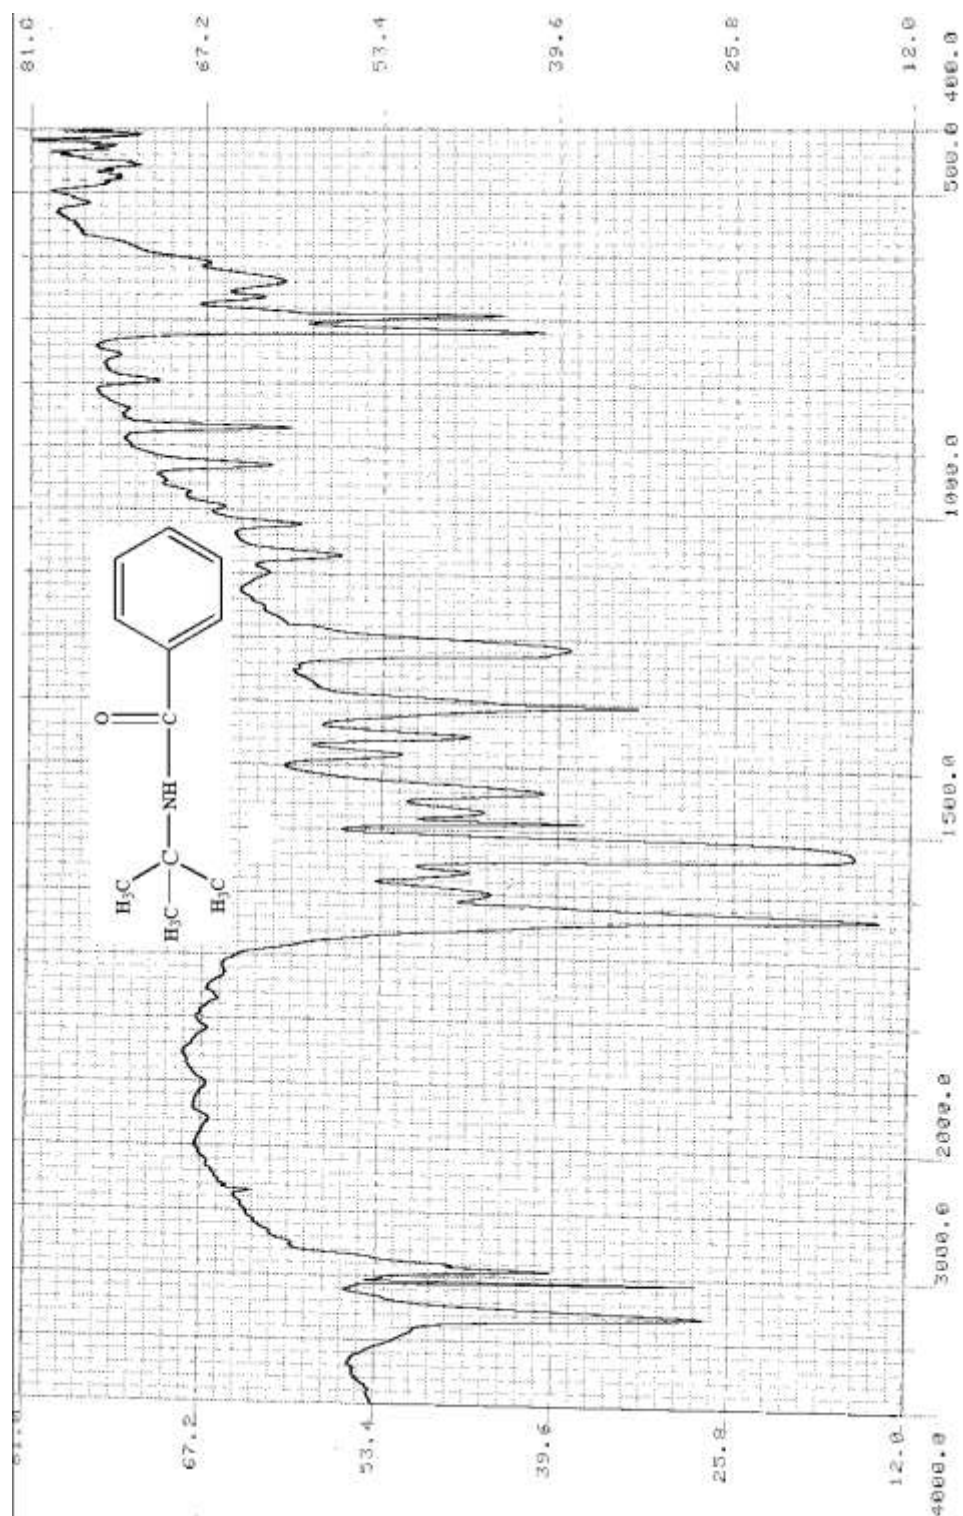

3. N-benzhydryl-2-chloroacetamide

<sup>1</sup>HNMR:

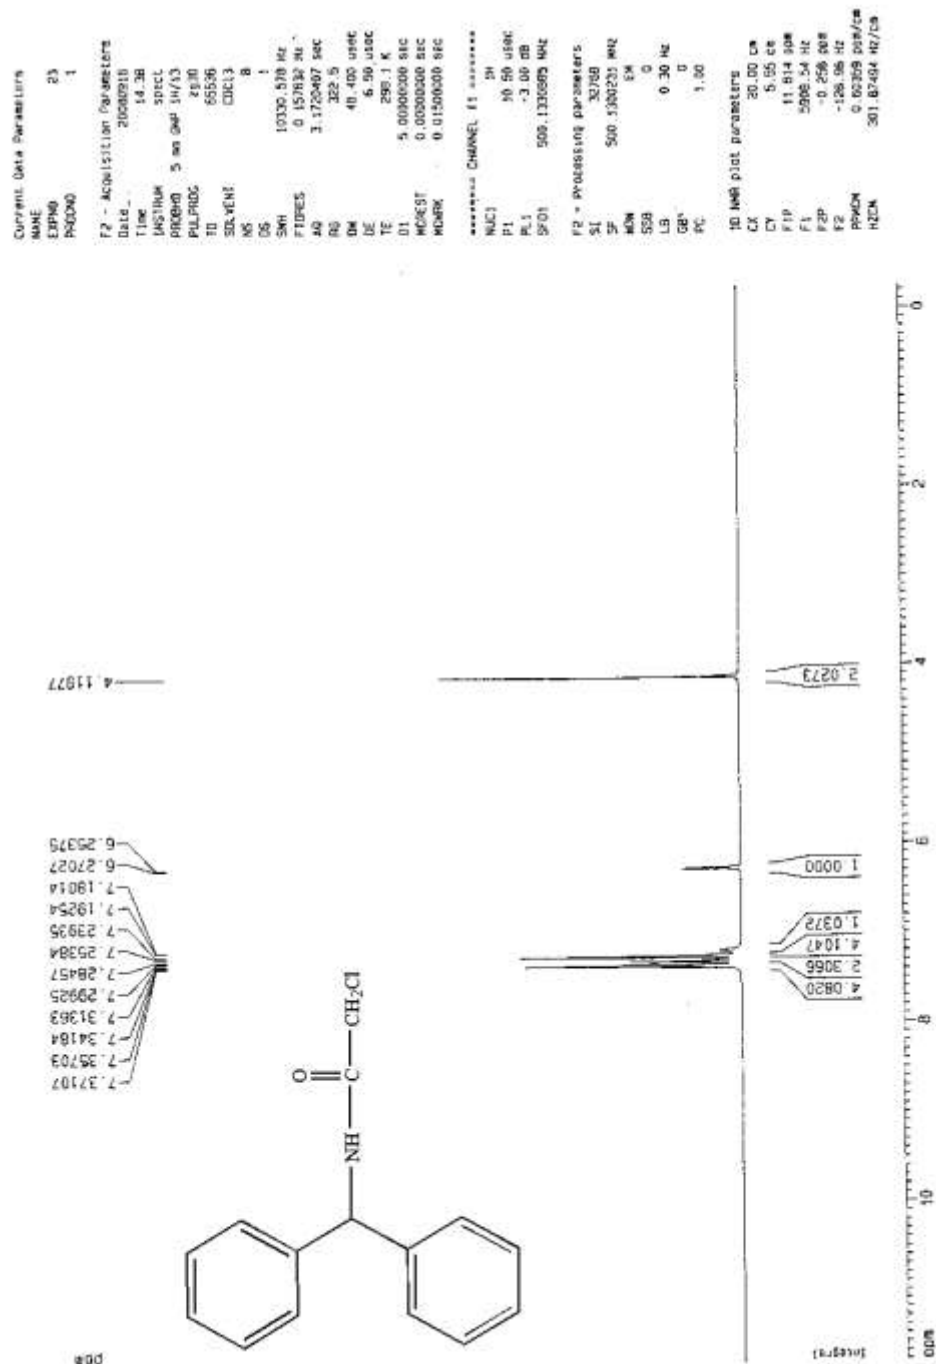

Expand:

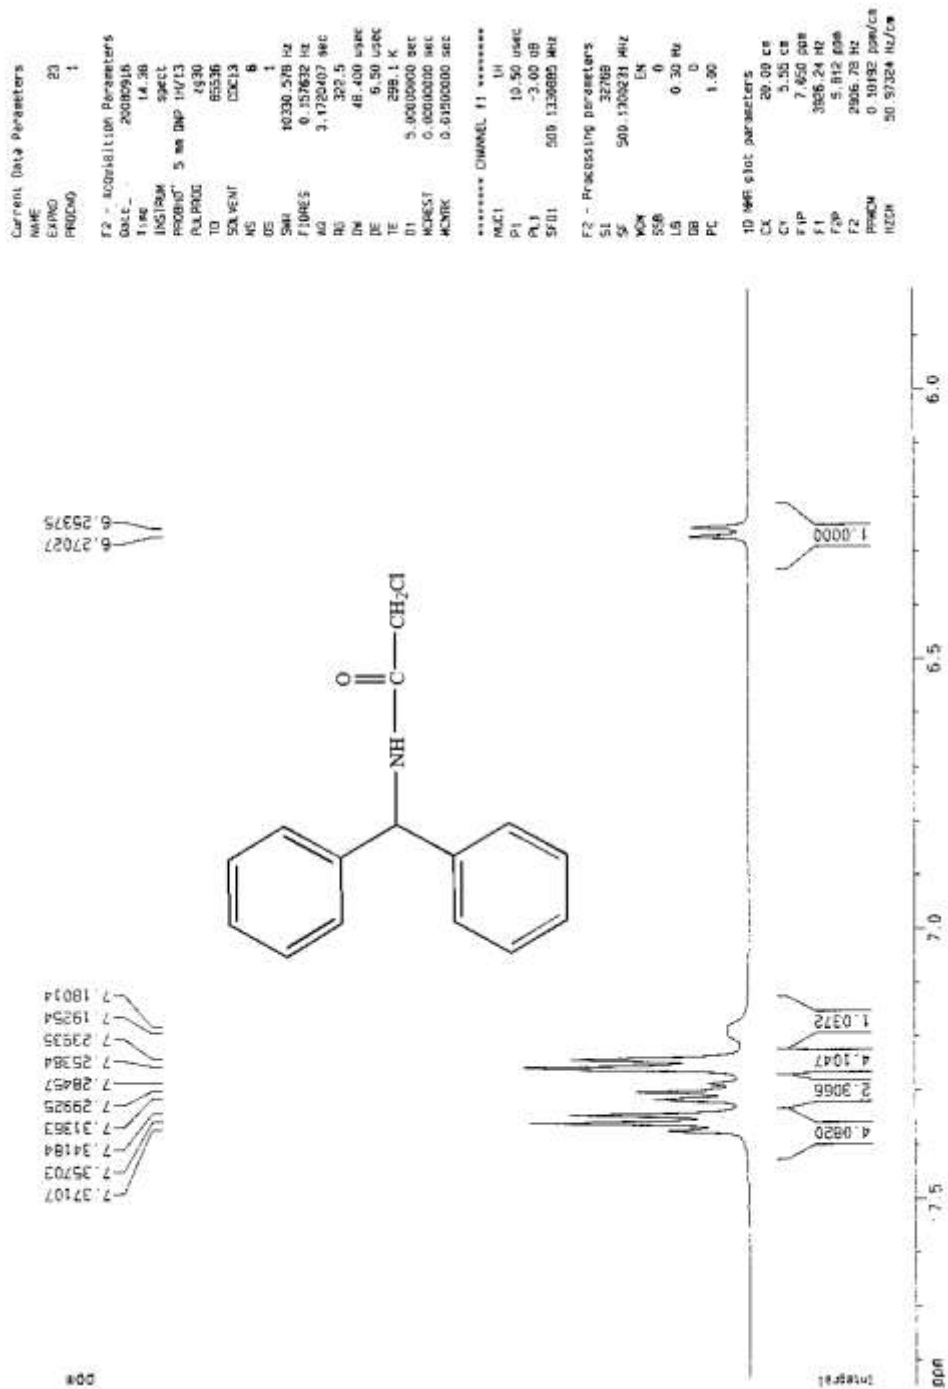

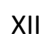

IR:

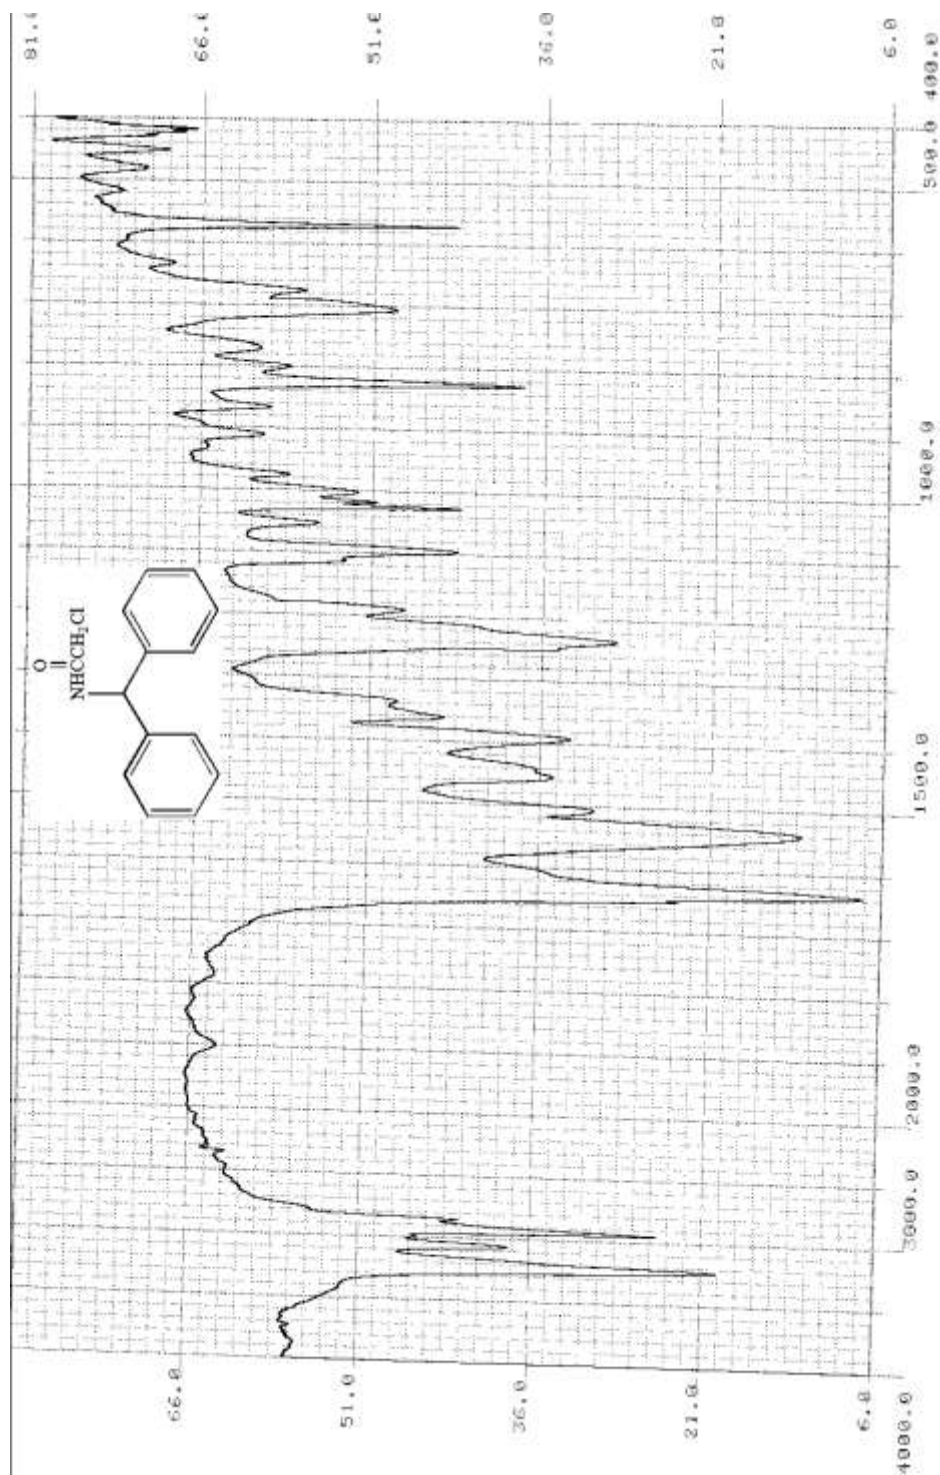



4. N-(4-tert-butylbenzyl) benzamide

<sup>1</sup>HNMR:

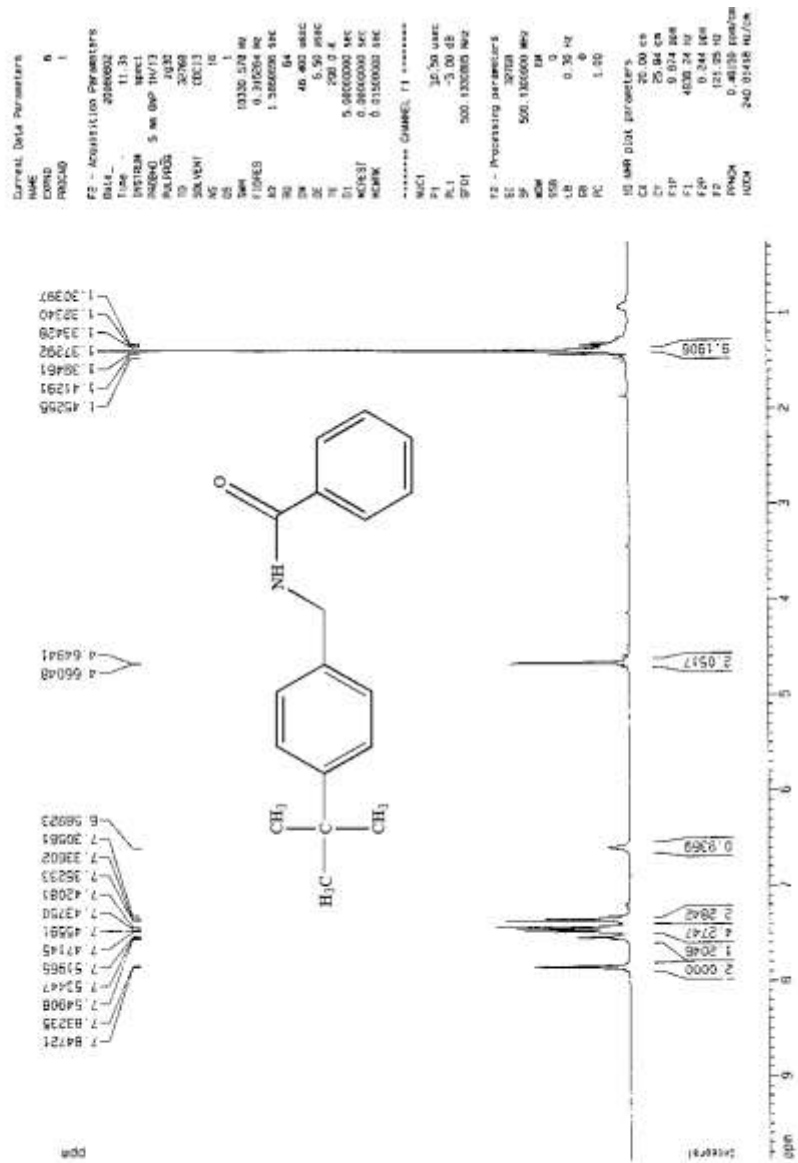

Expand:

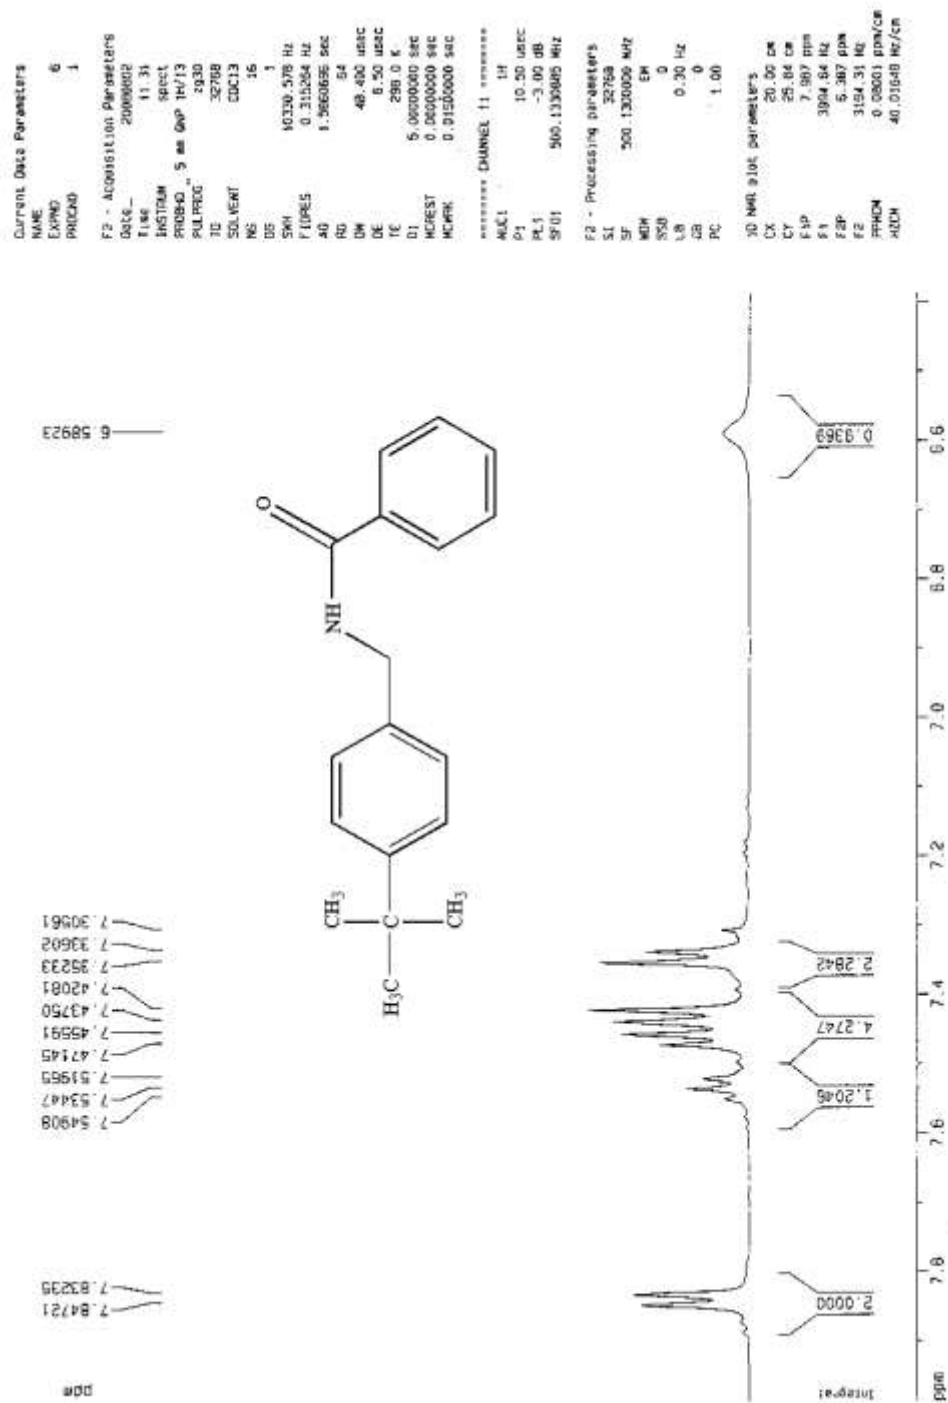



<sup>13</sup>CNMR:

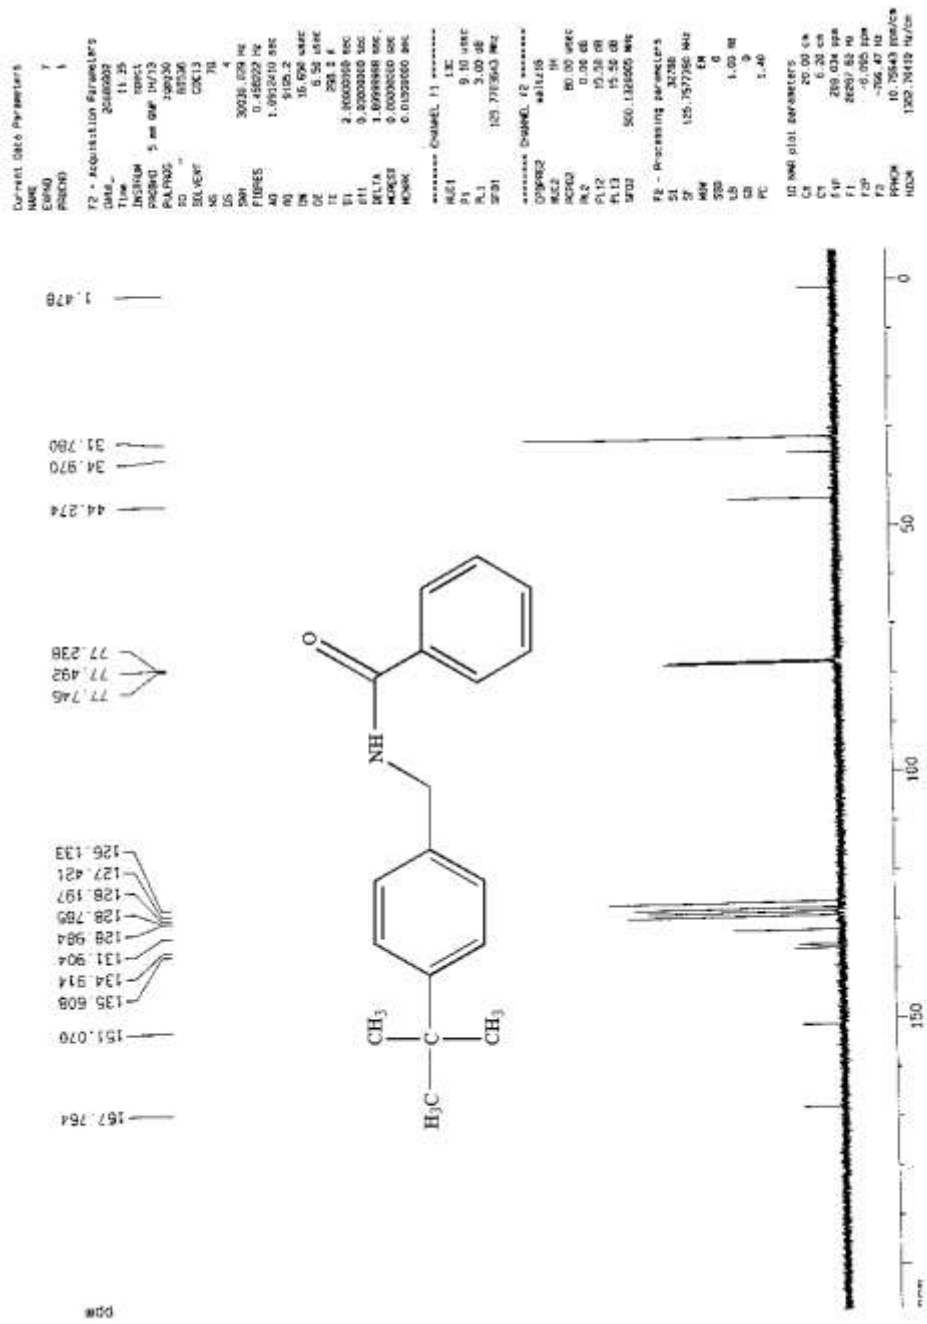

IR:

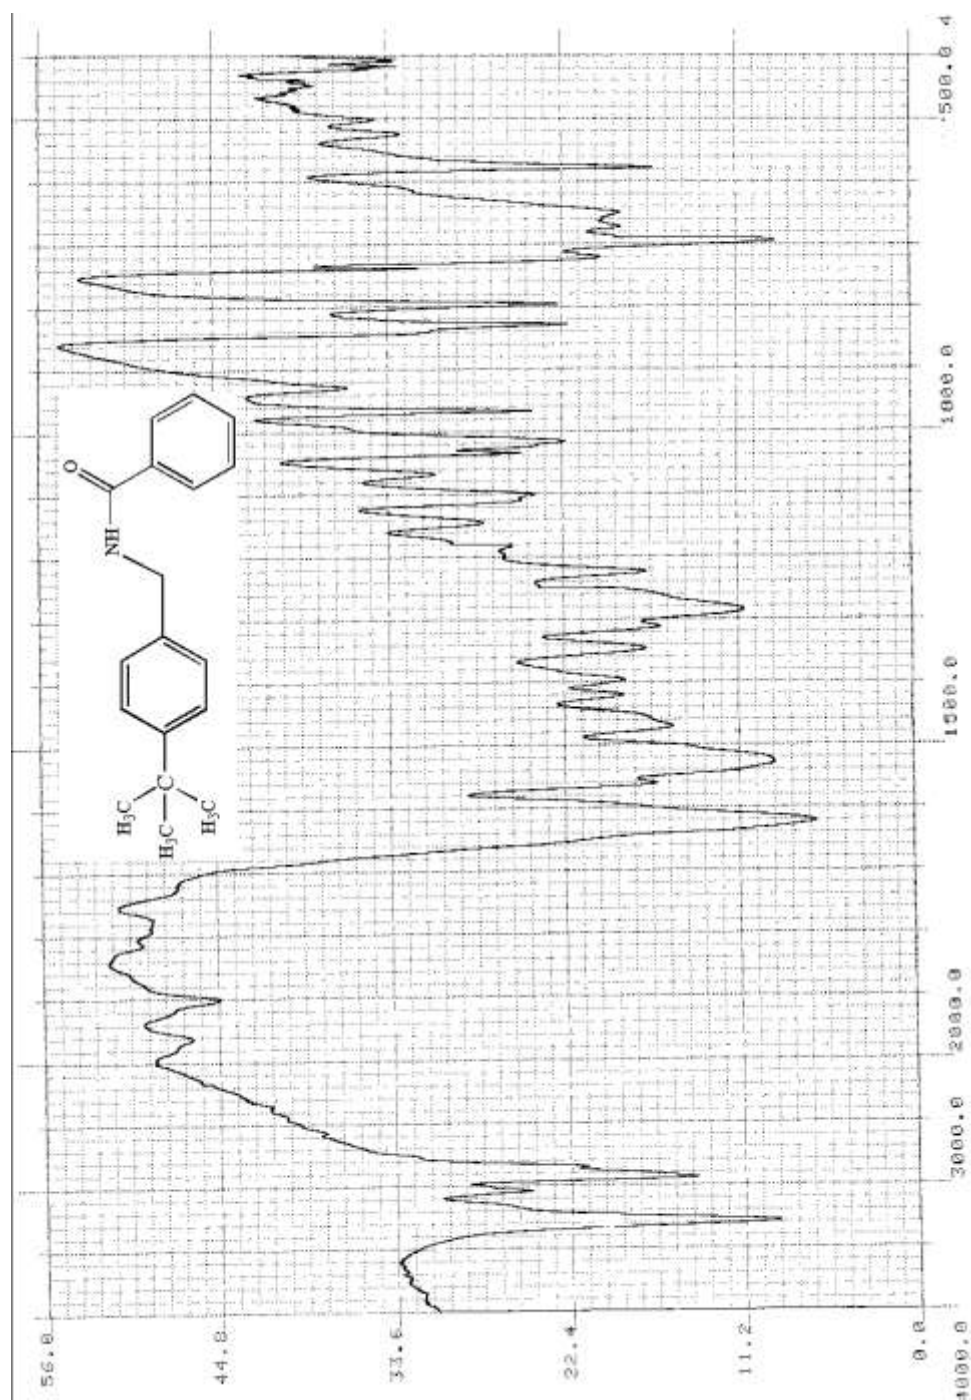

5. N-benzhydrylacetamide

<sup>1</sup>HNMR:

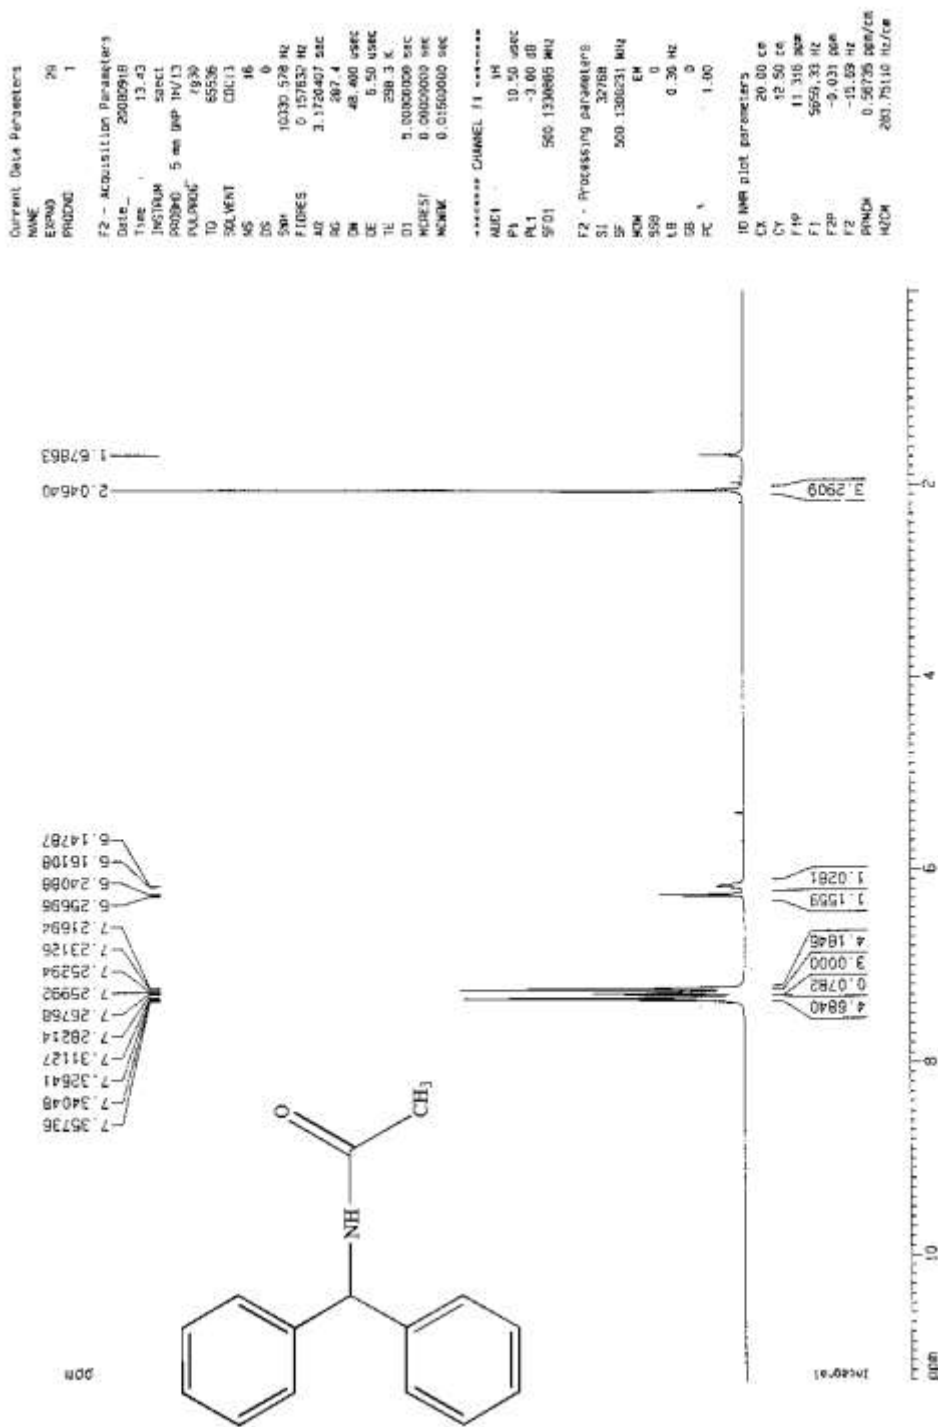

Expand:

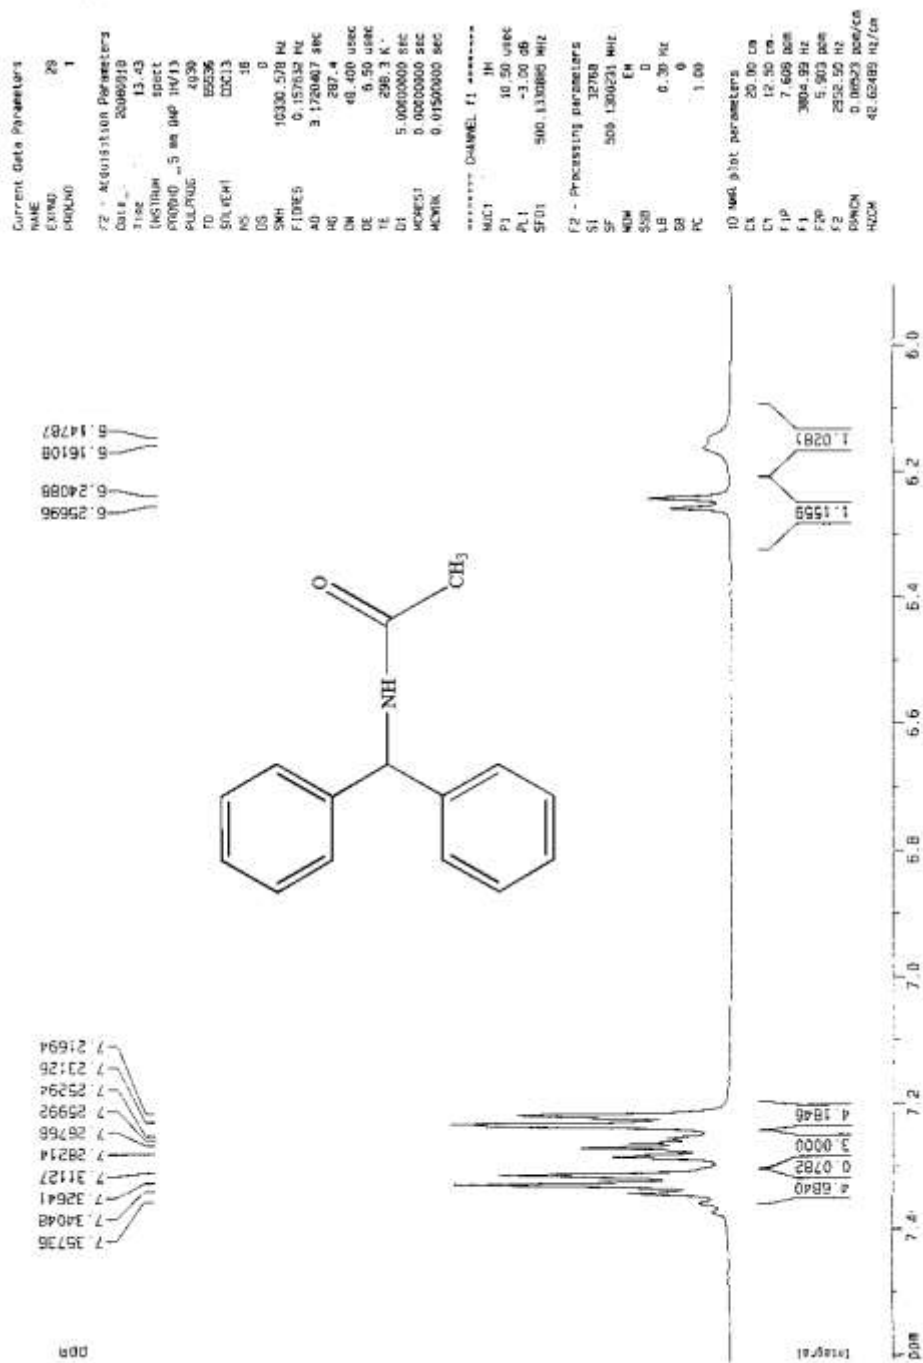

<sup>13</sup>CNMR:

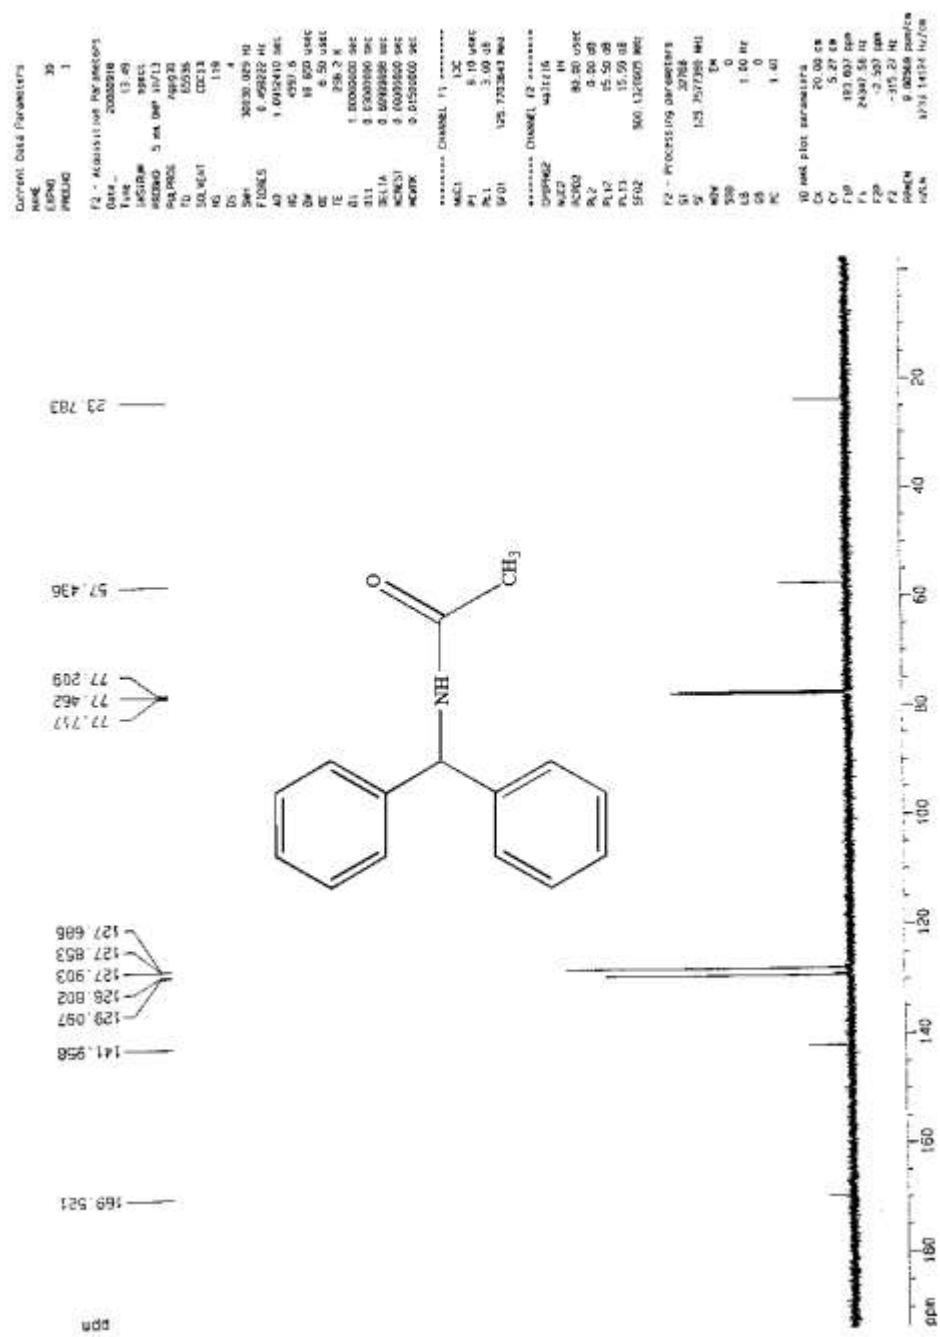



IR:

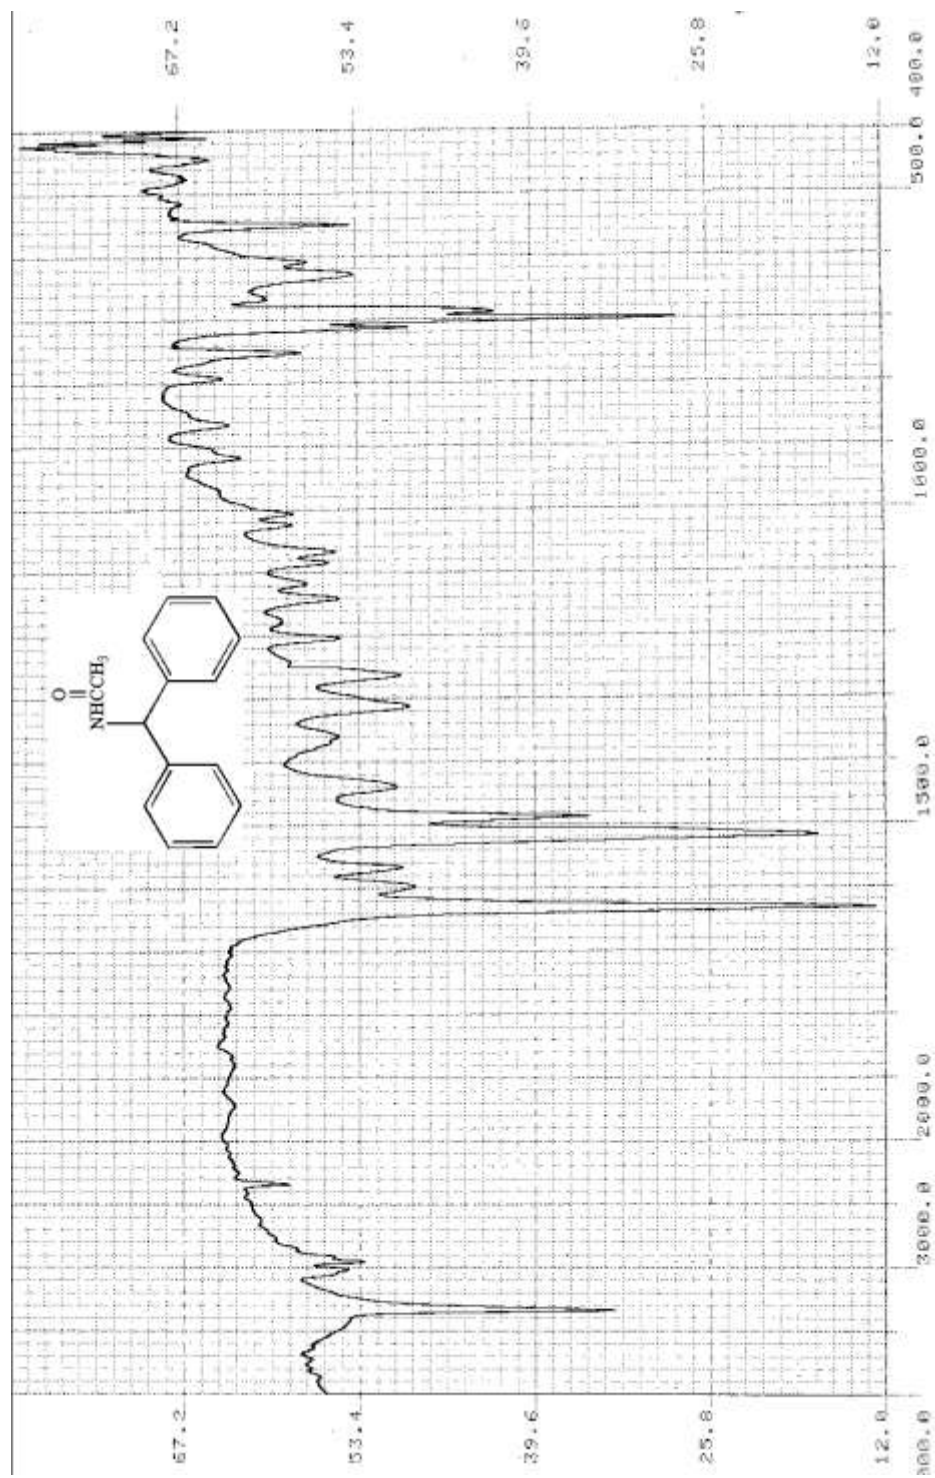





Expand:

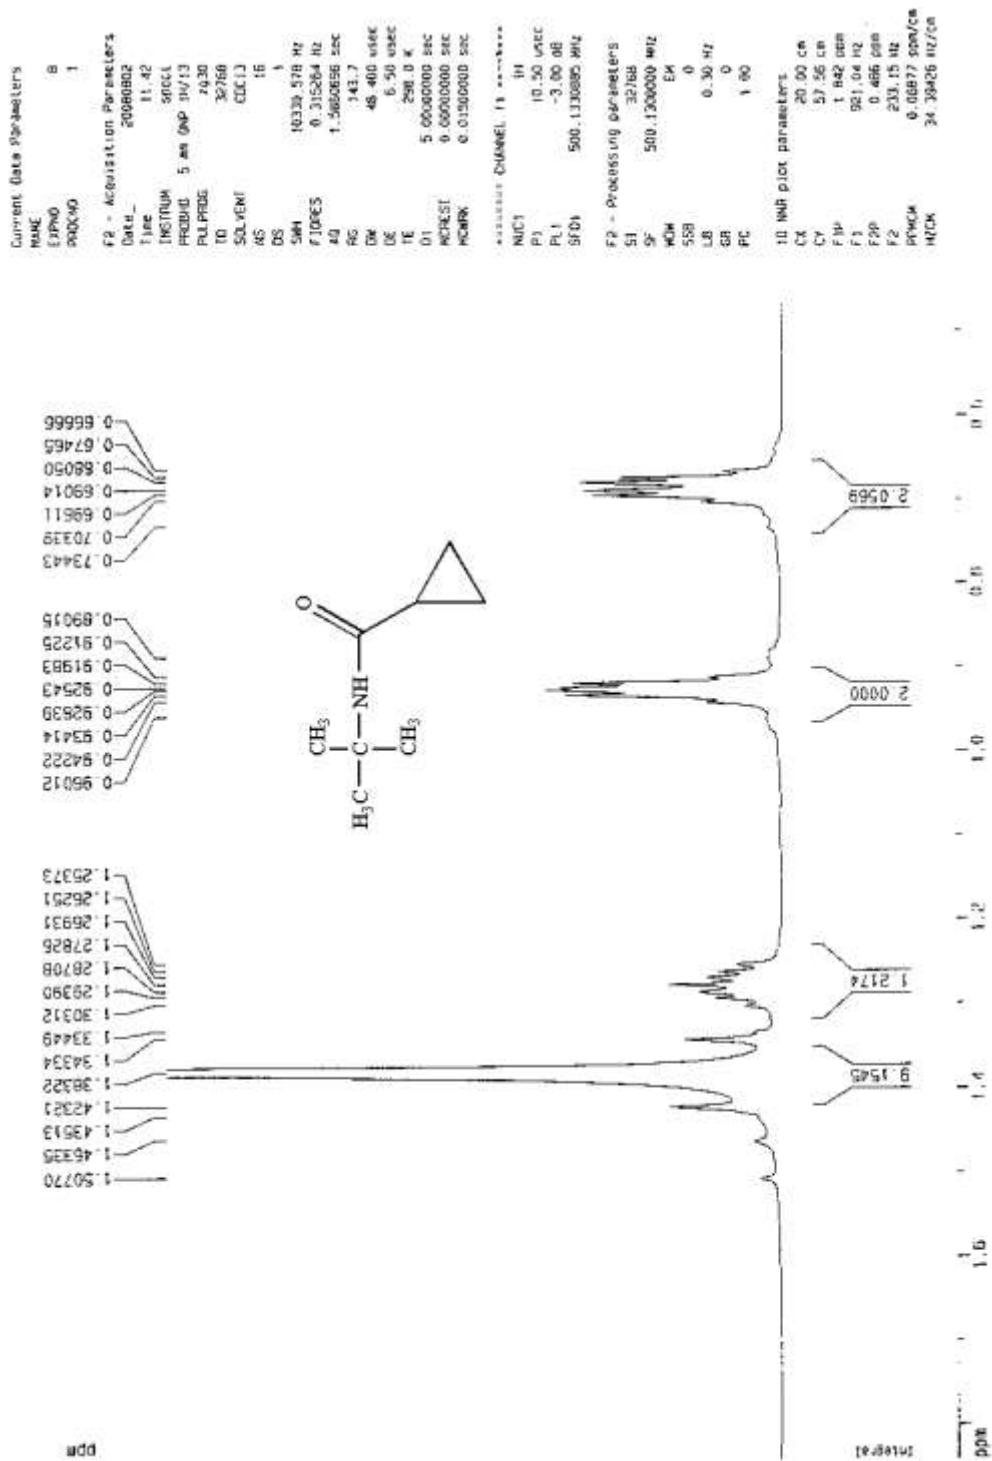

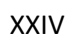

IR:

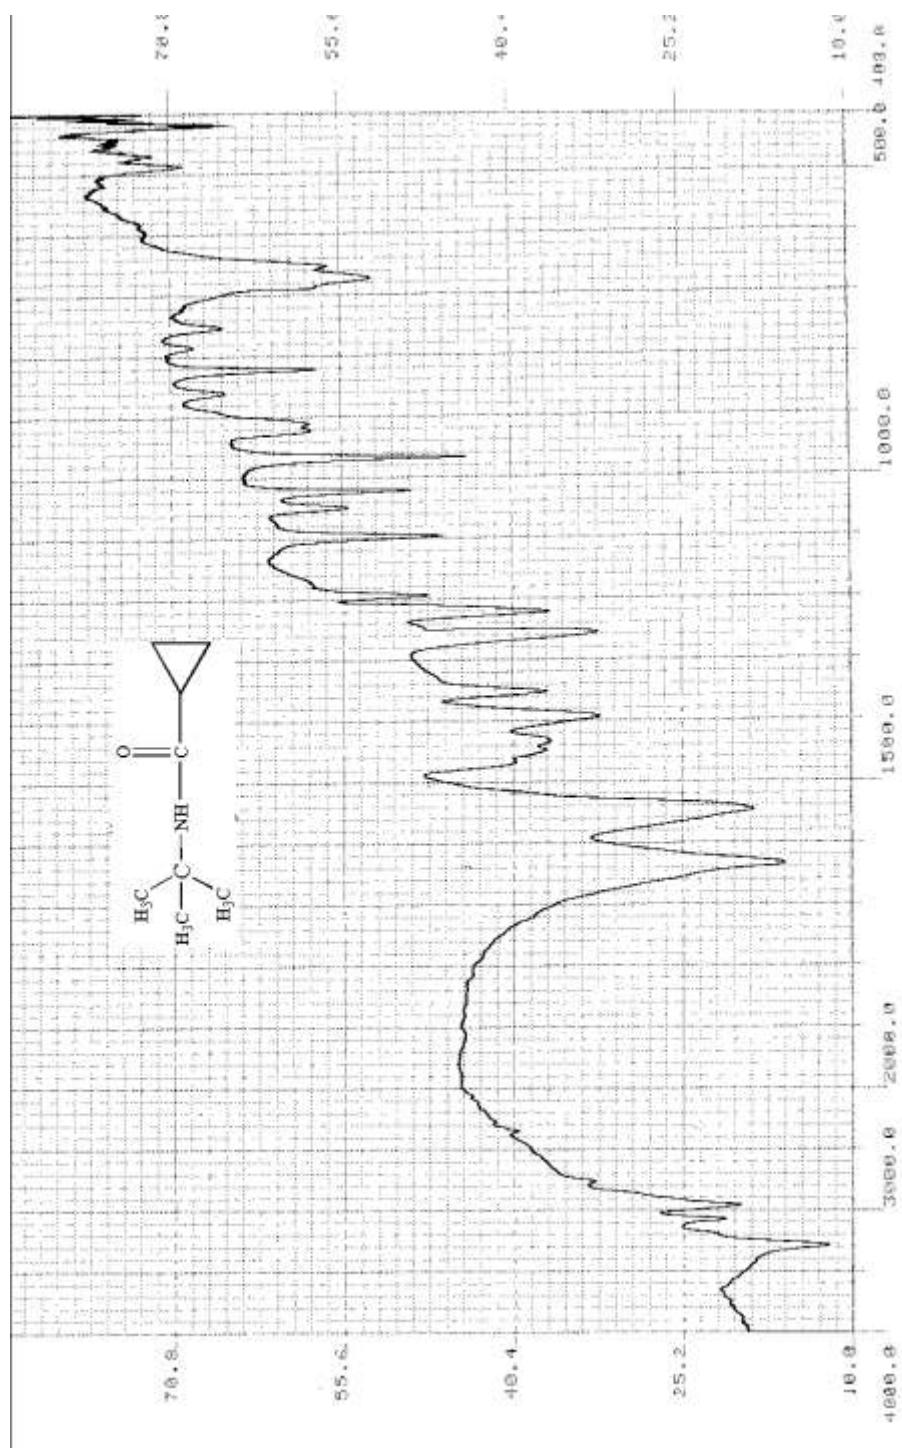

7. N-tert-butyl cyclohexane carboxamide

<sup>1</sup>HNMR:

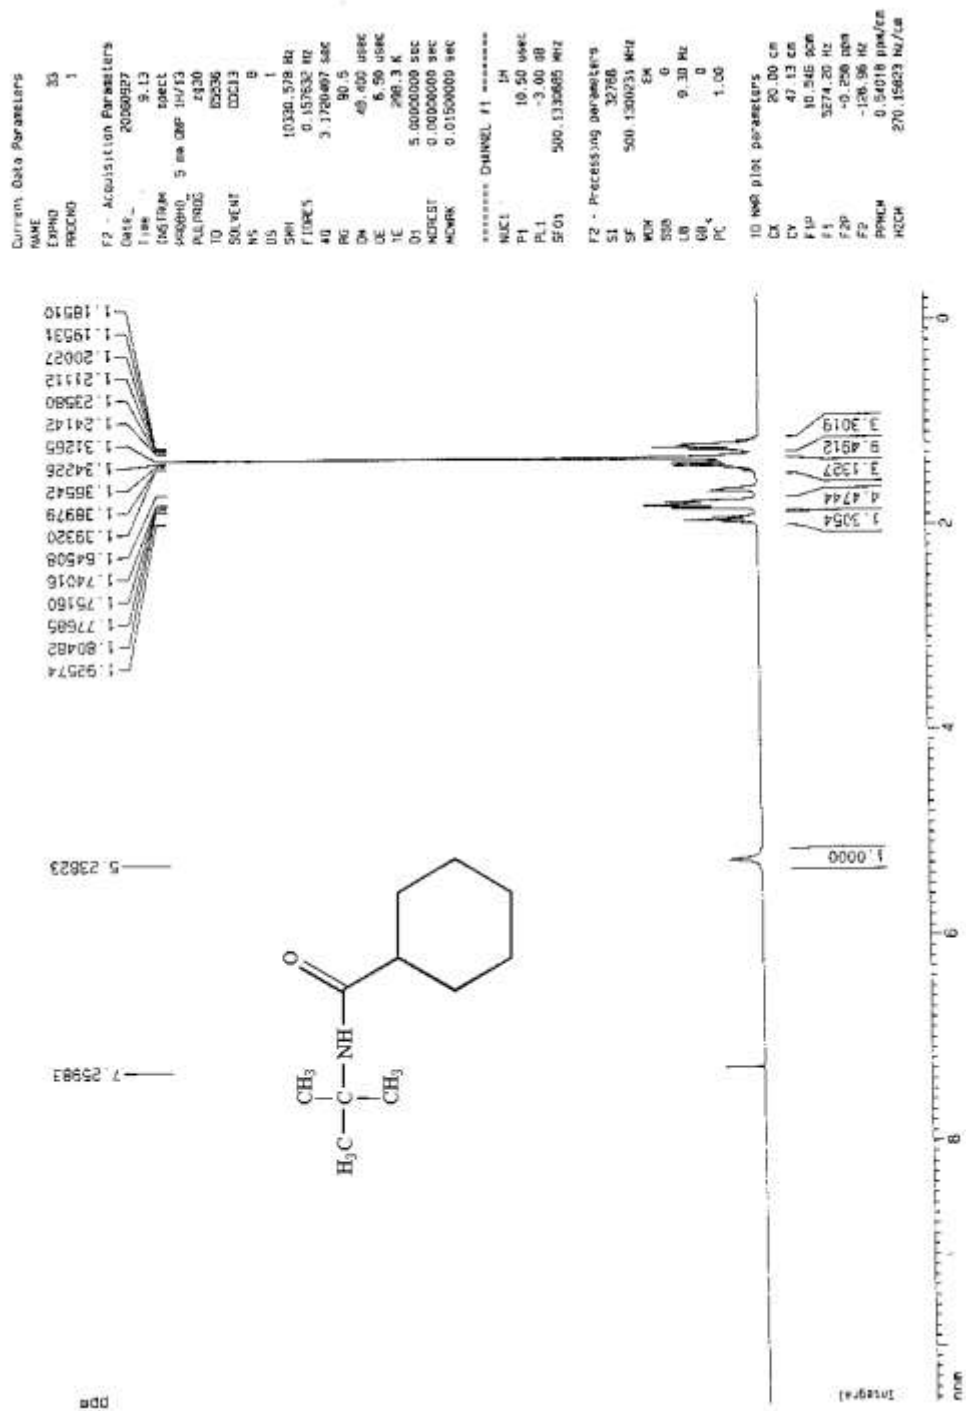

Expand:

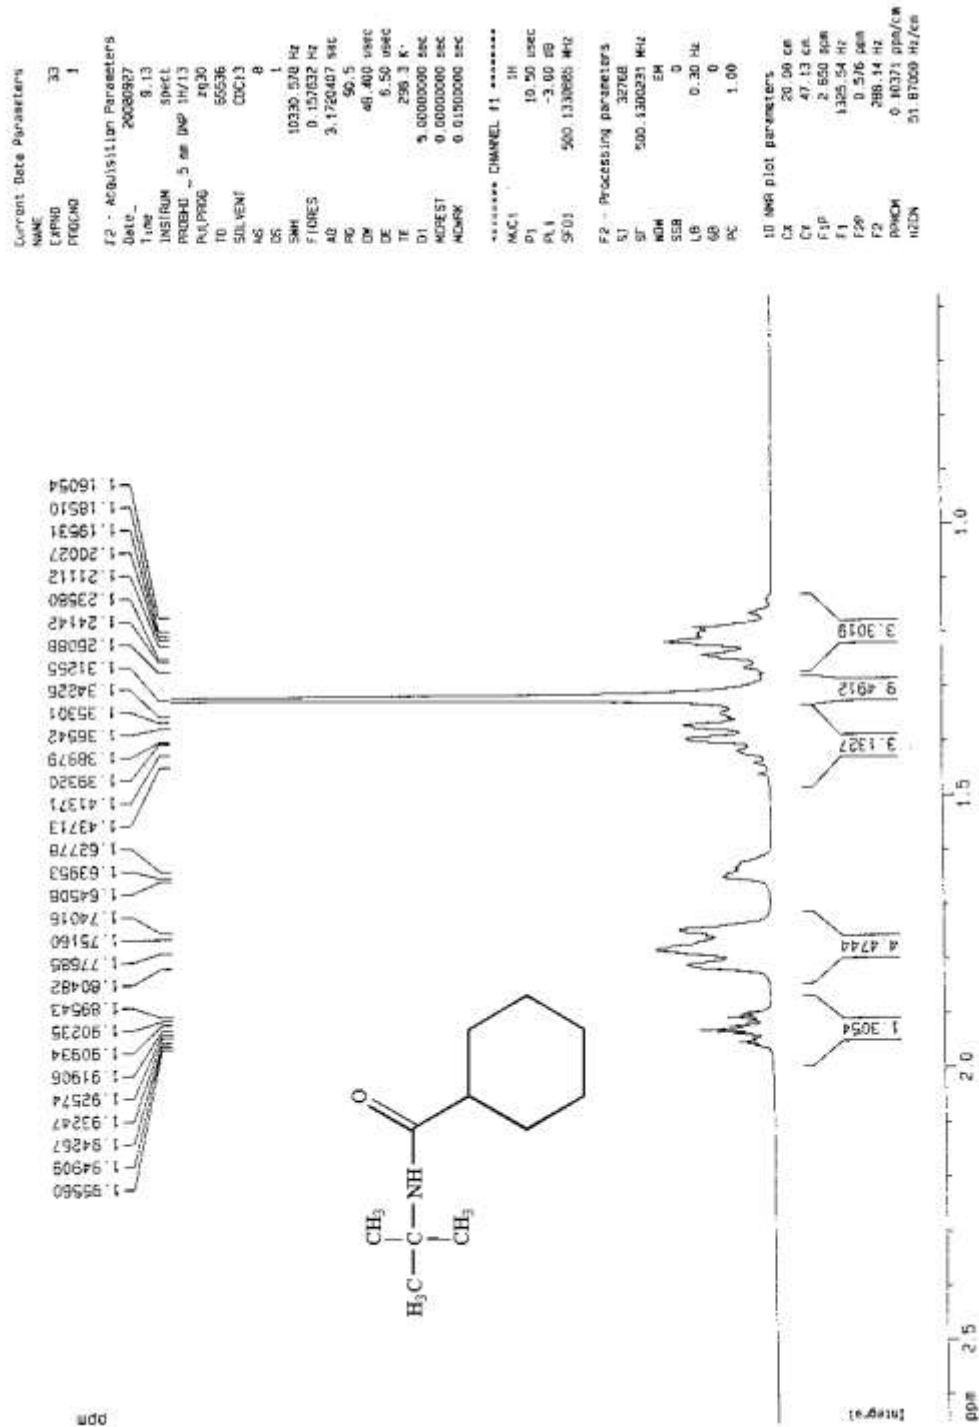

<sup>13</sup>CNMR:

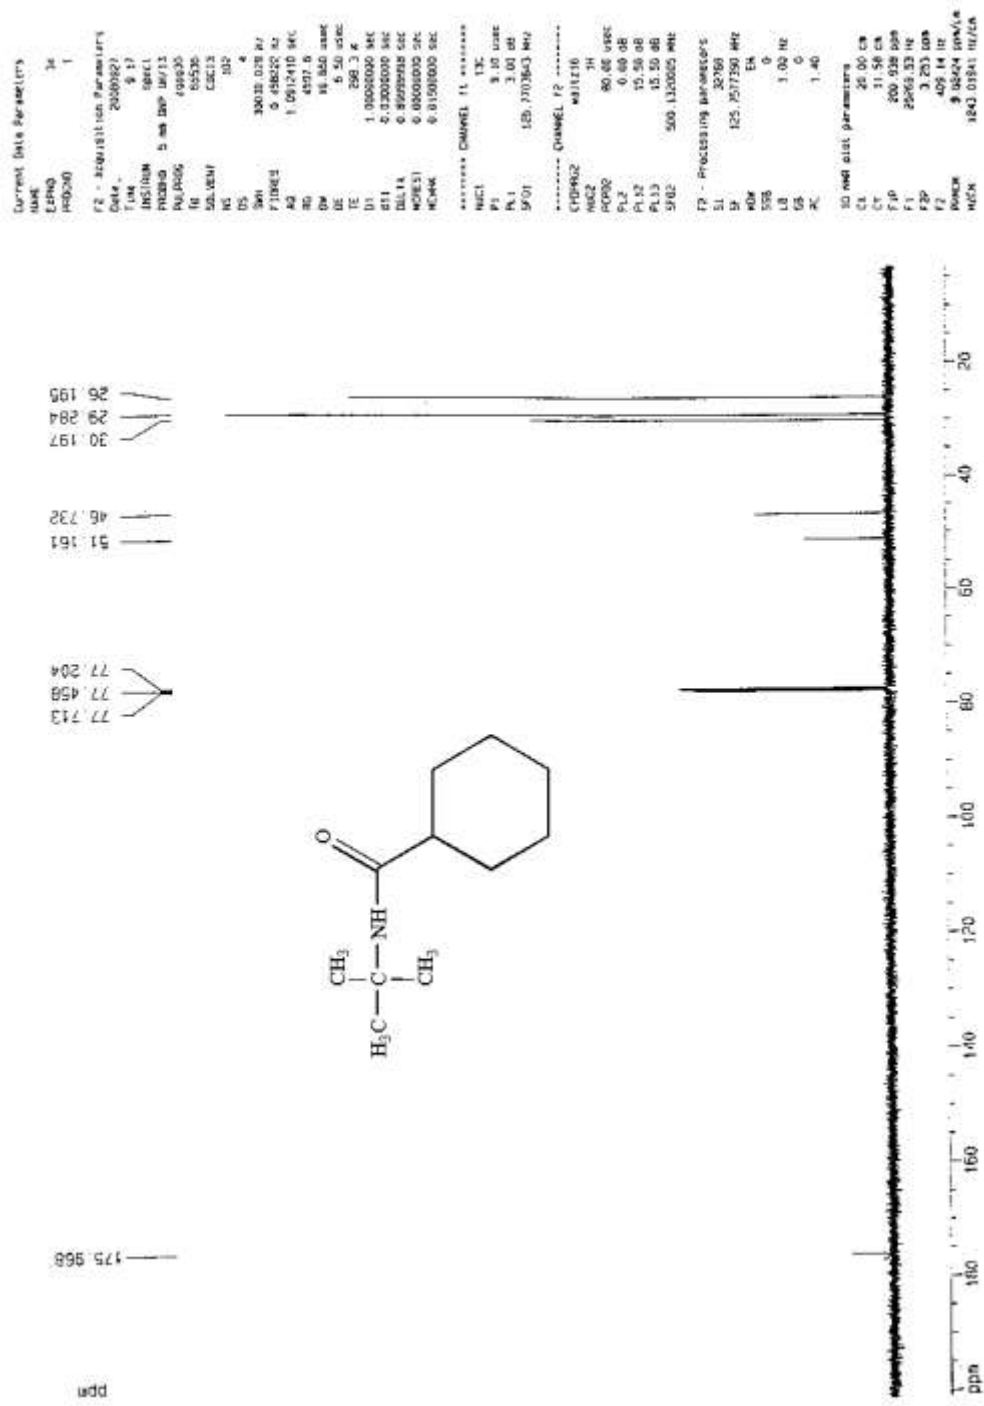



IR:

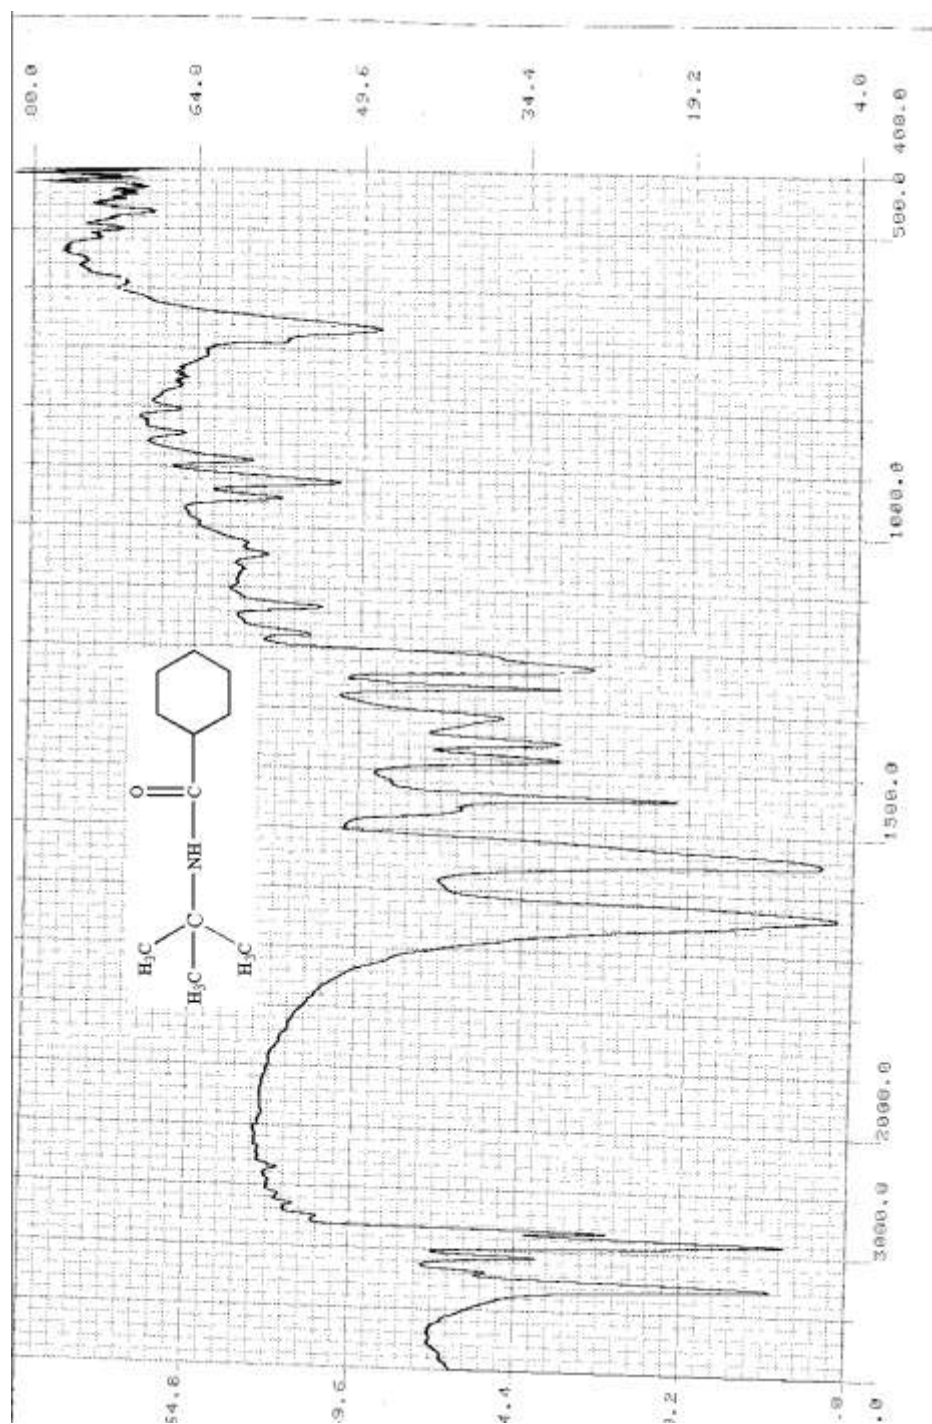



8. N-(1-phenylethyl) benzamide

<sup>1</sup>HNMR:

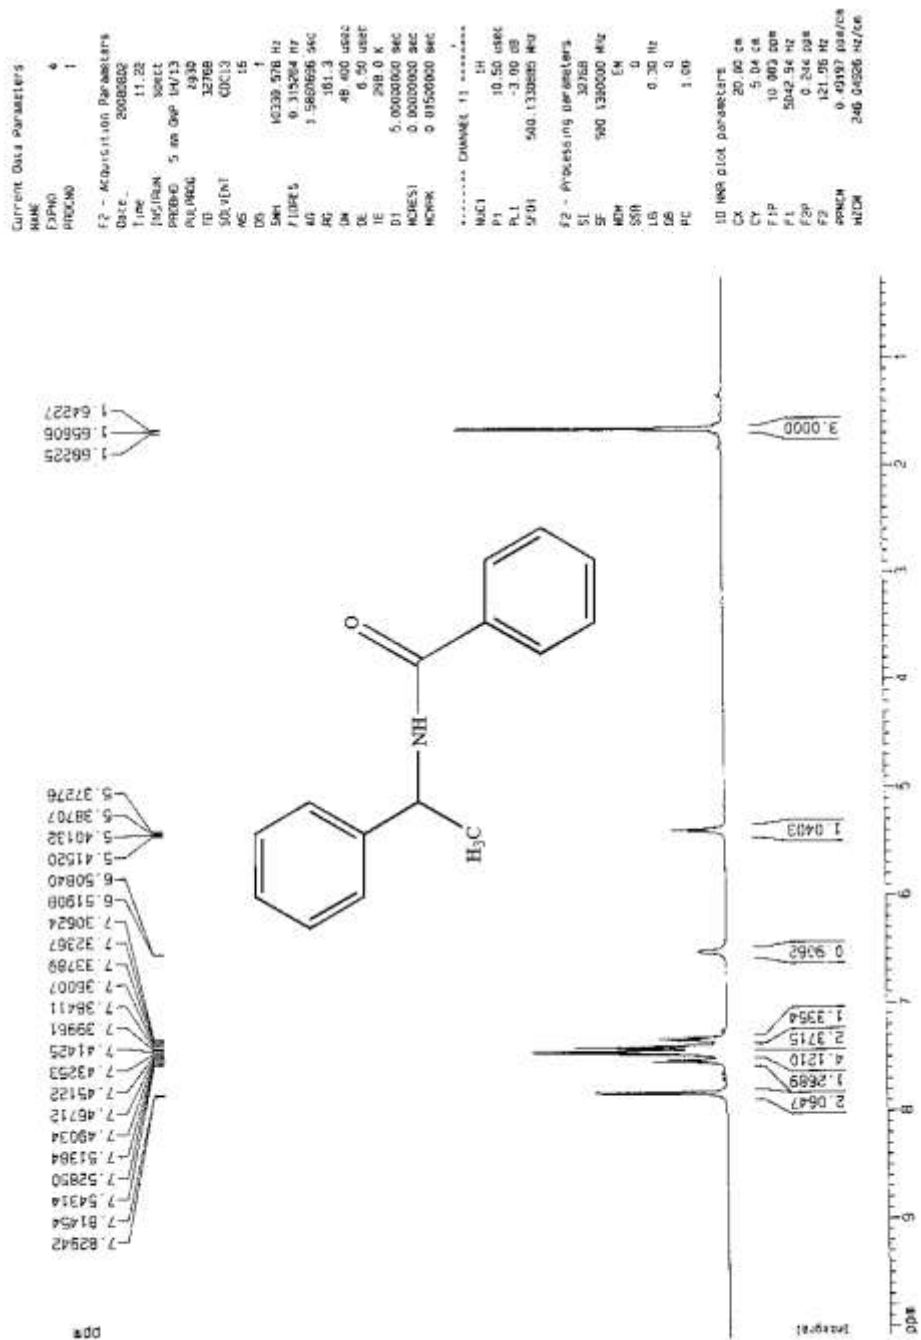

Expand:

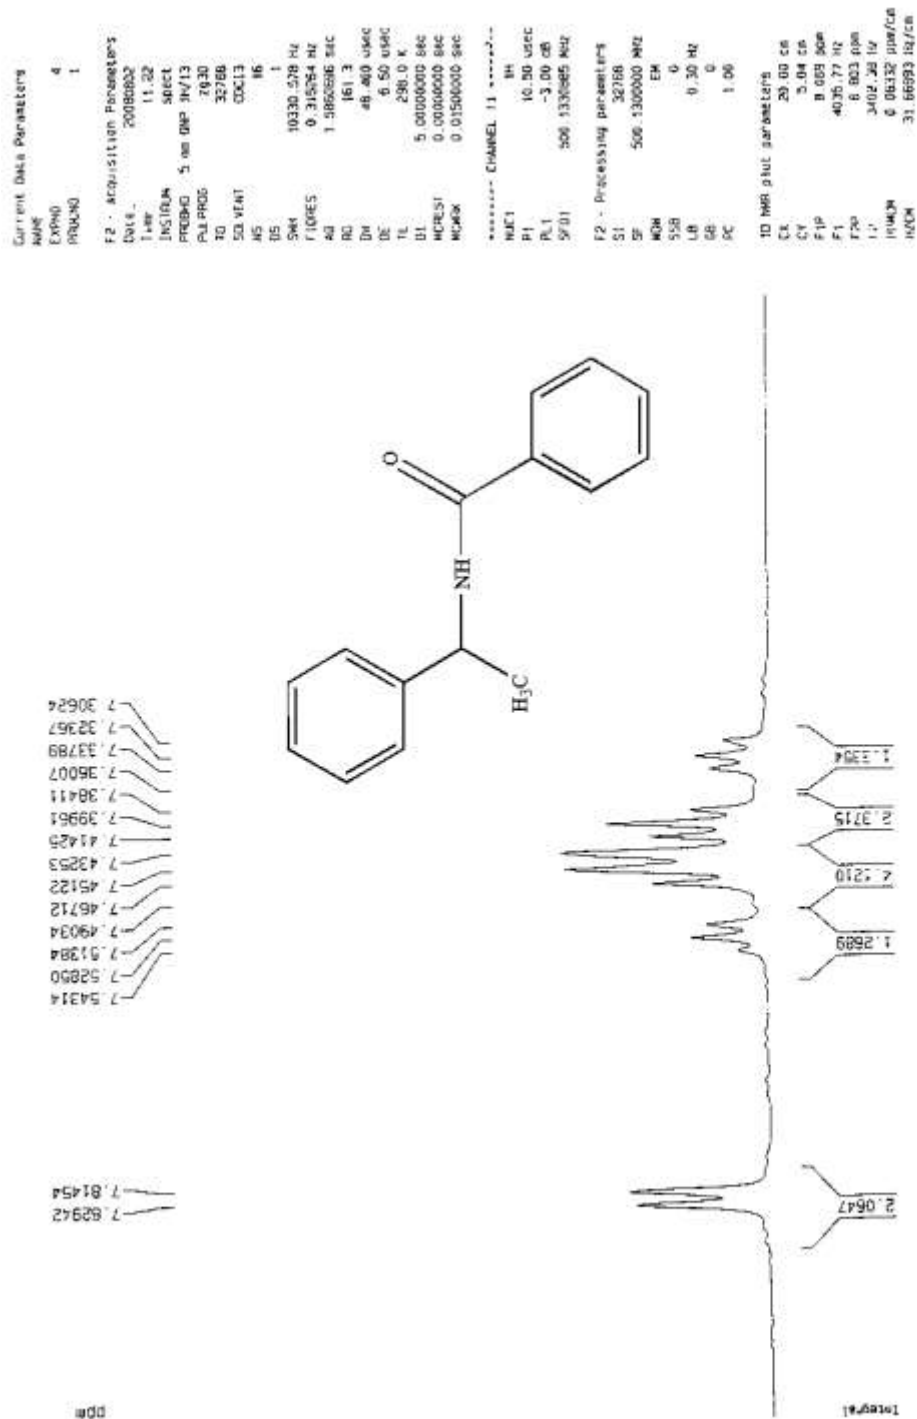

<sup>13</sup>CNMR:

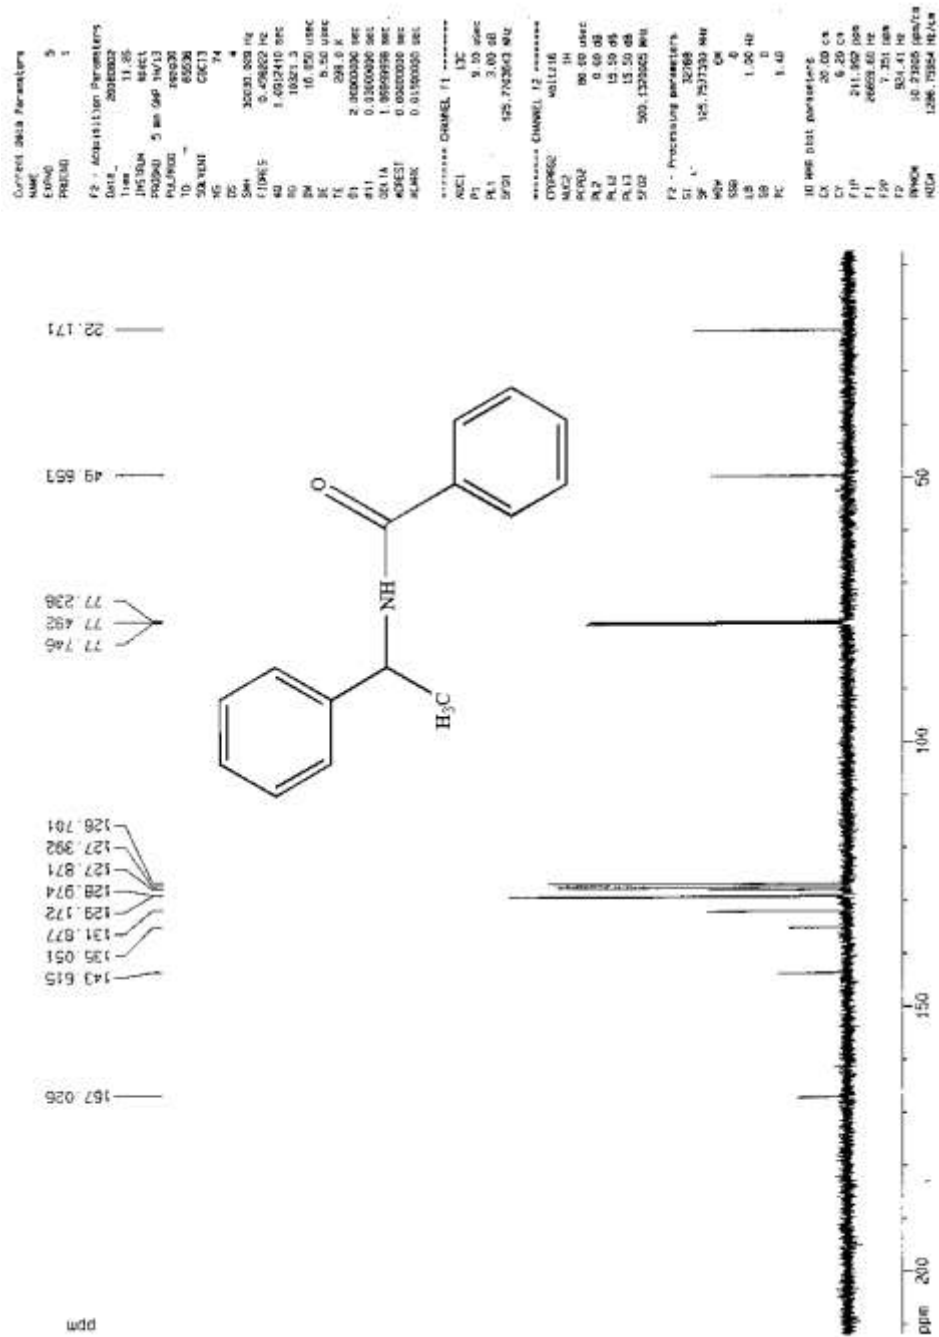

IR:

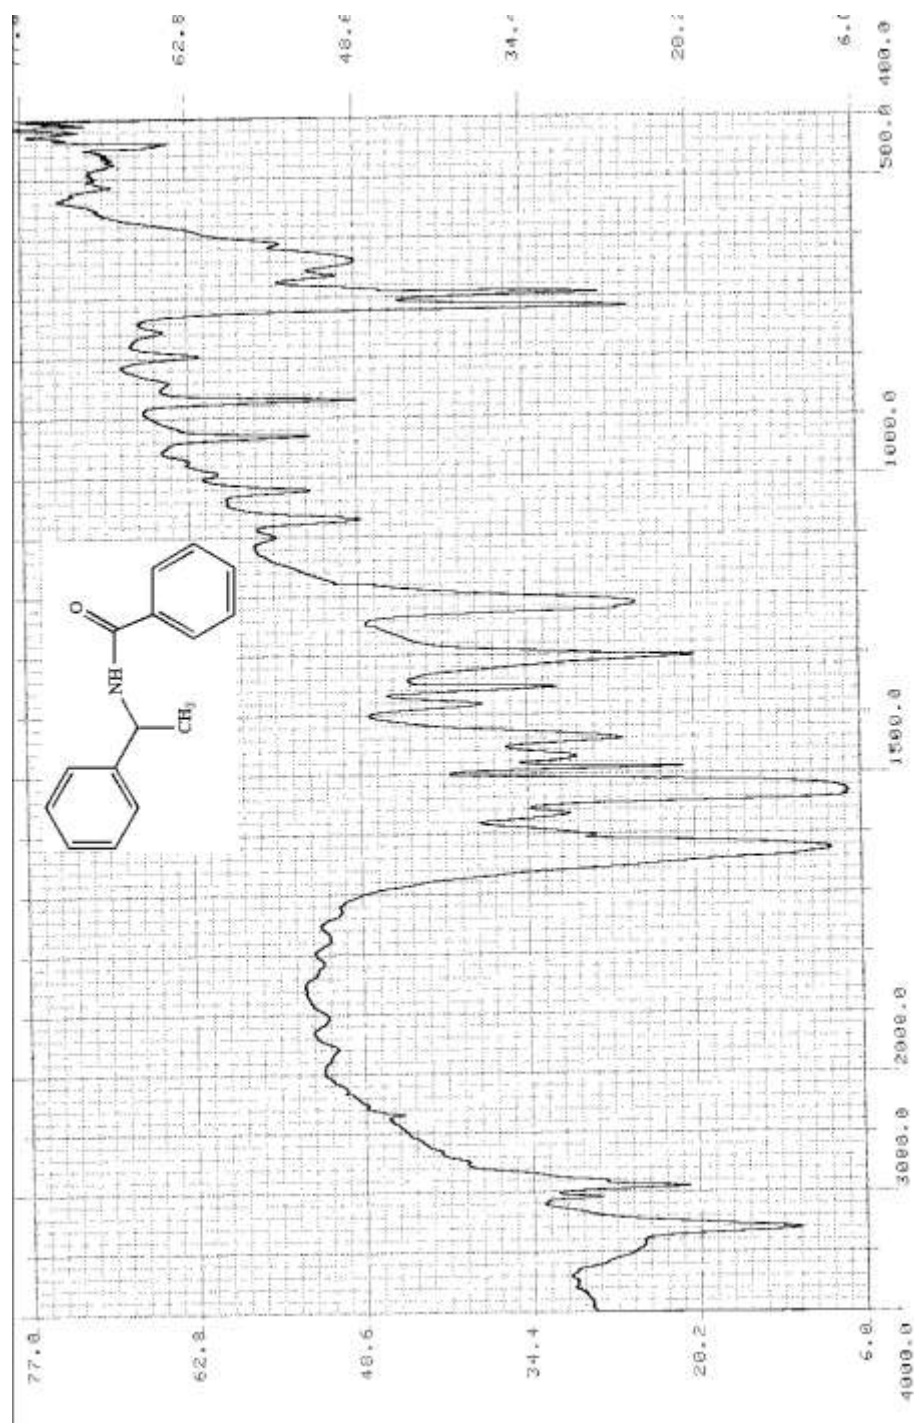

9. N-(1-phenylethyl) cyclohexane carboxamide

<sup>1</sup>HNMR:

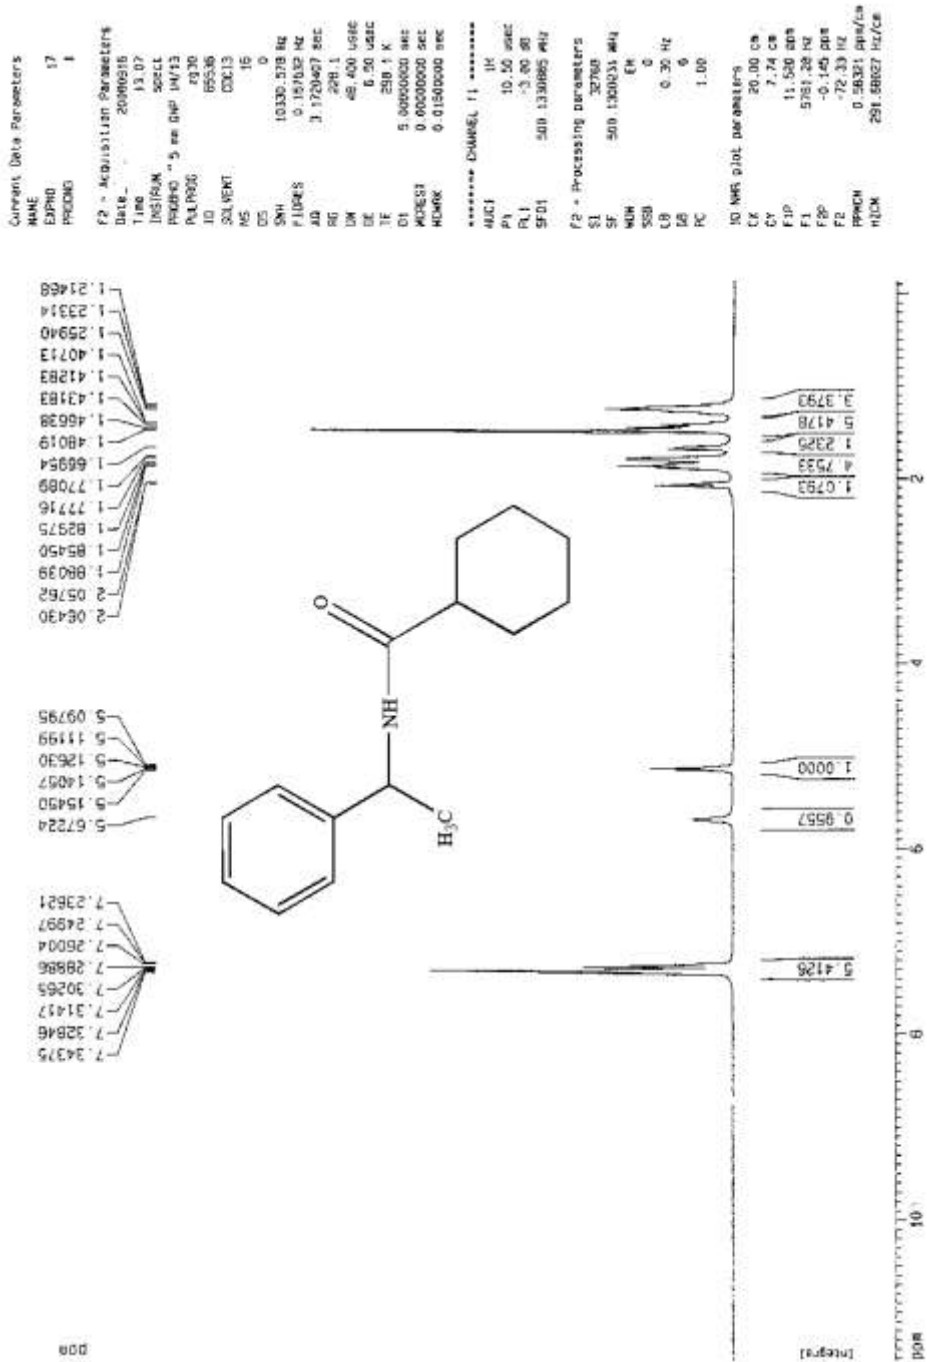



<sup>13</sup>CNMR:

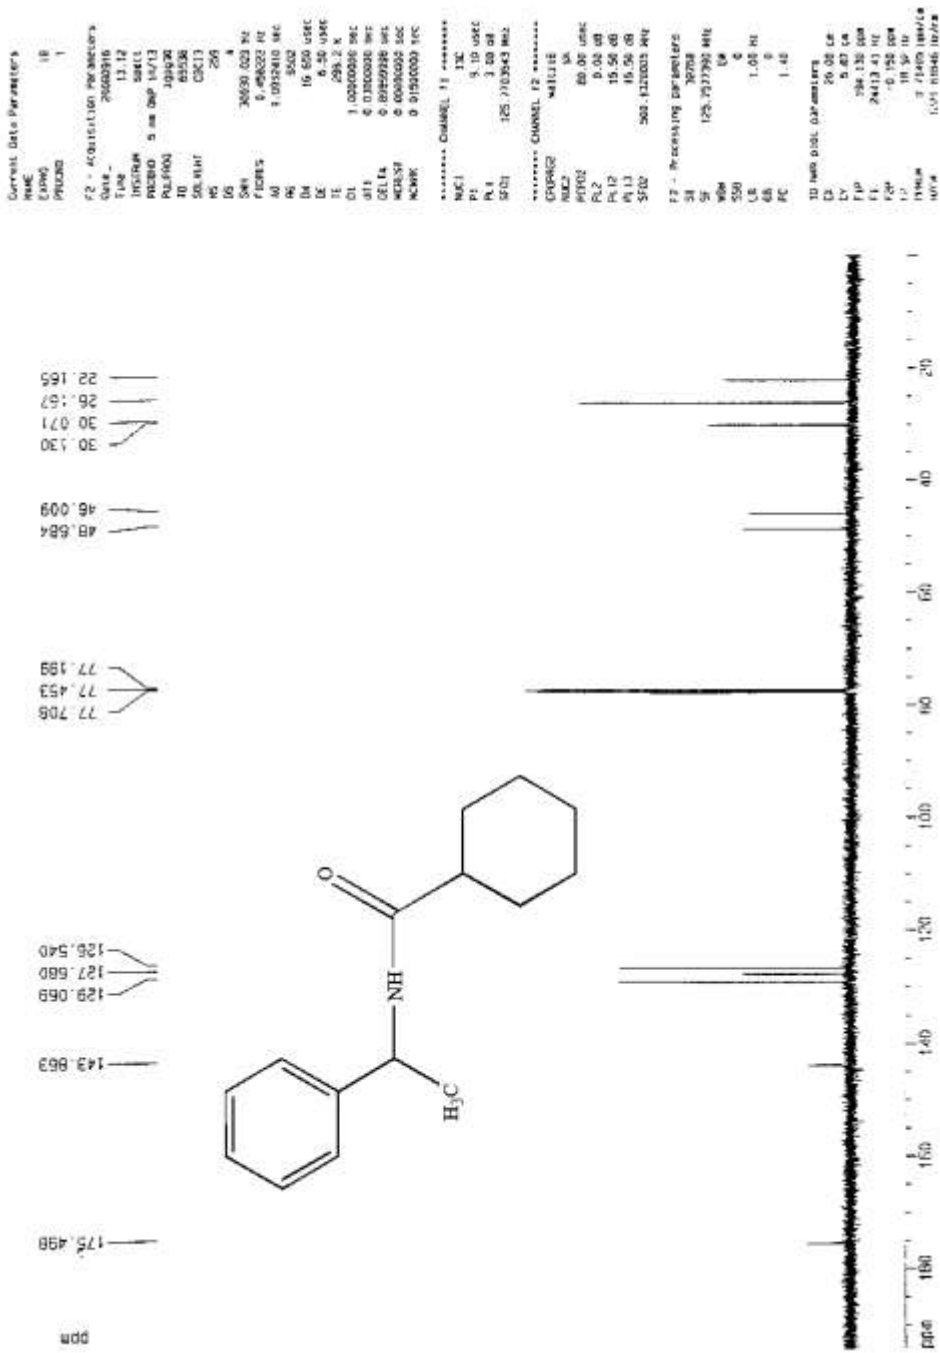



IR:

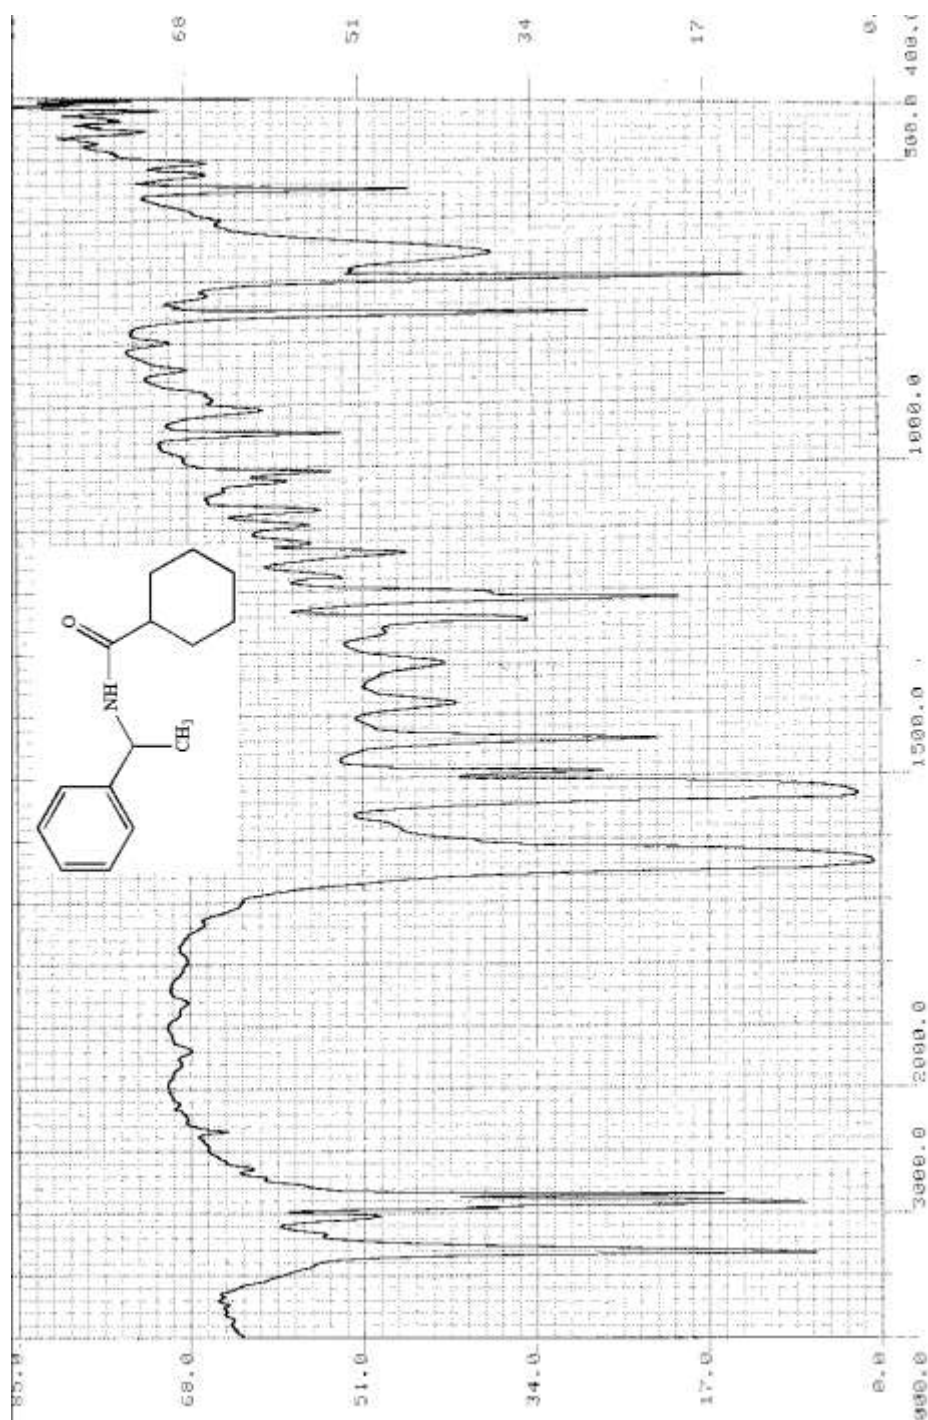

10. N-benzhydryl propionamide

<sup>1</sup>HNMR:

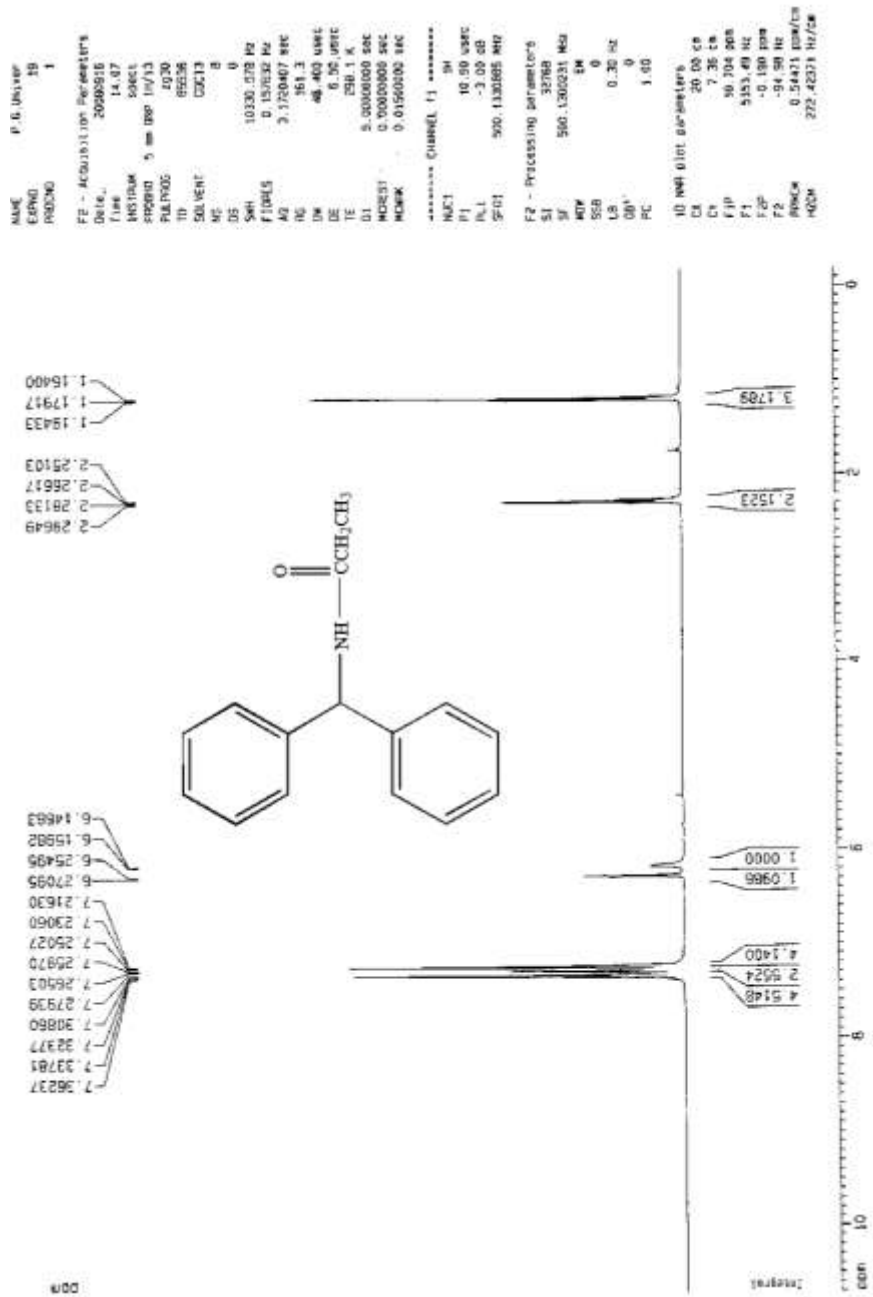

Expand:

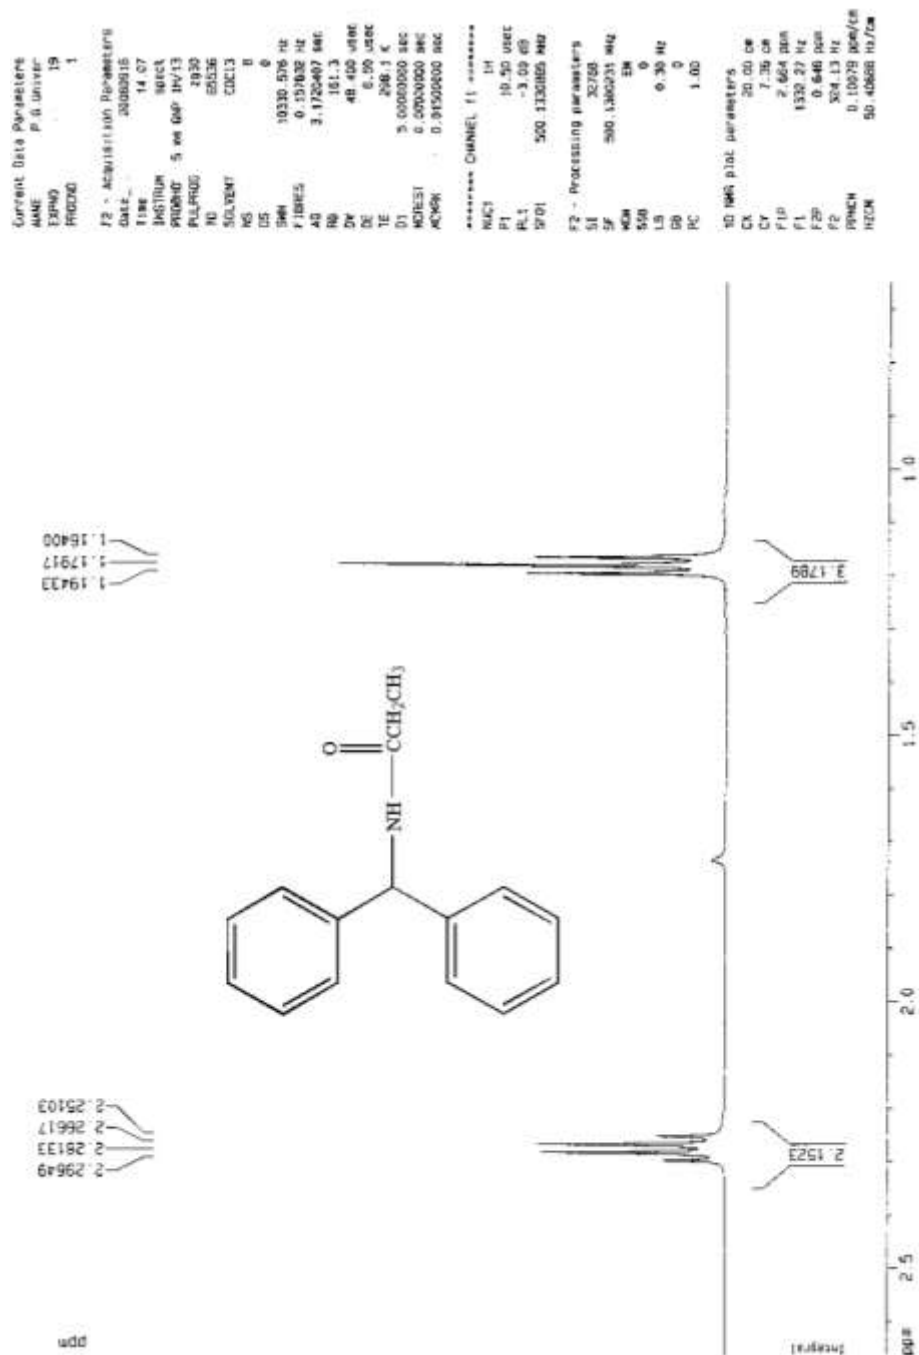

<sup>13</sup>CNMR:

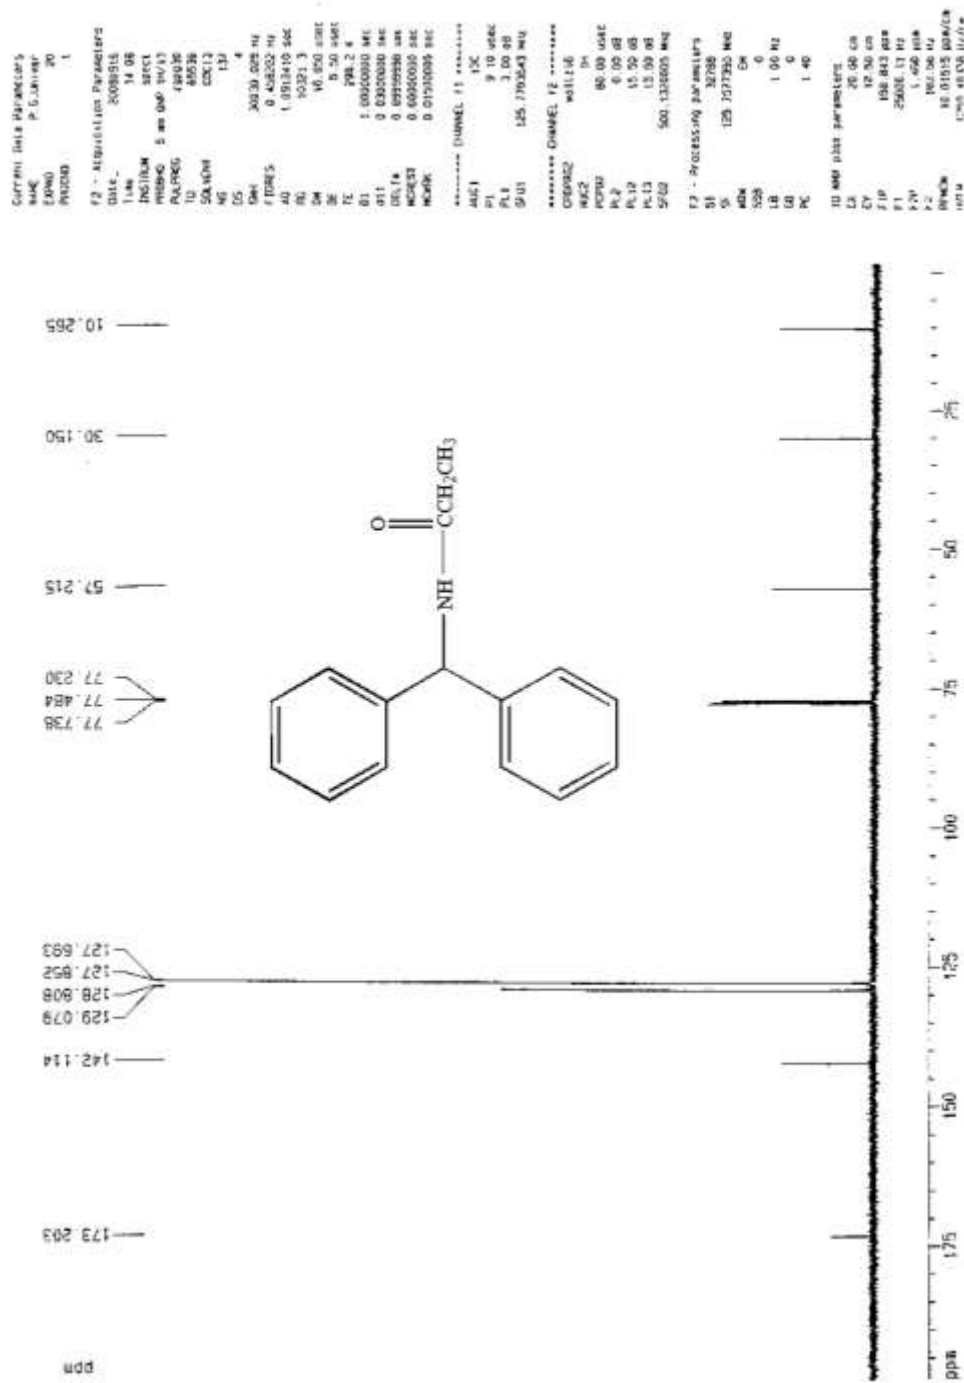

IR:

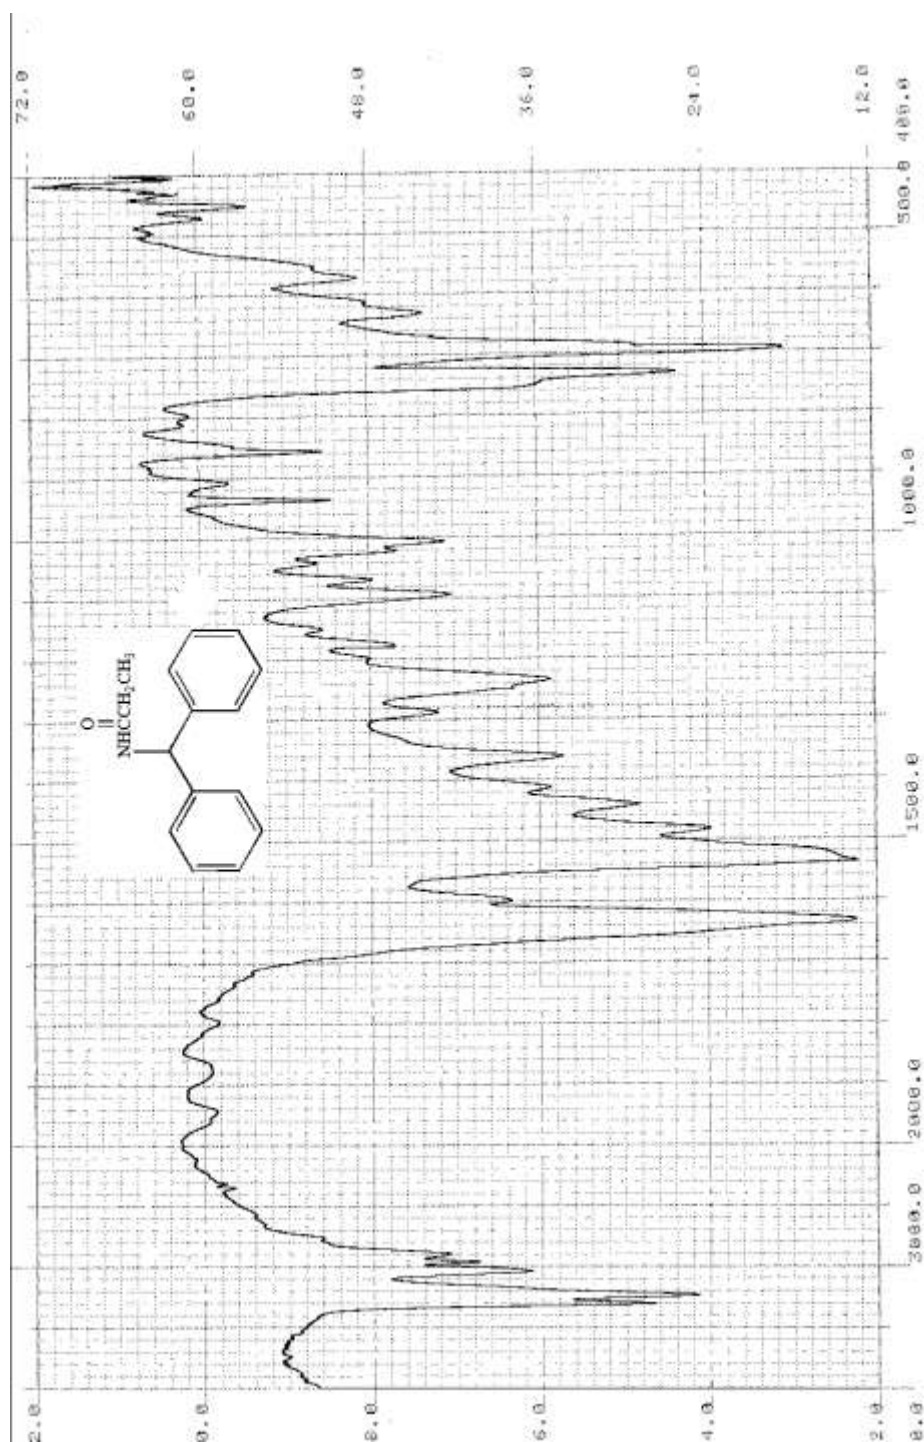





Expand:

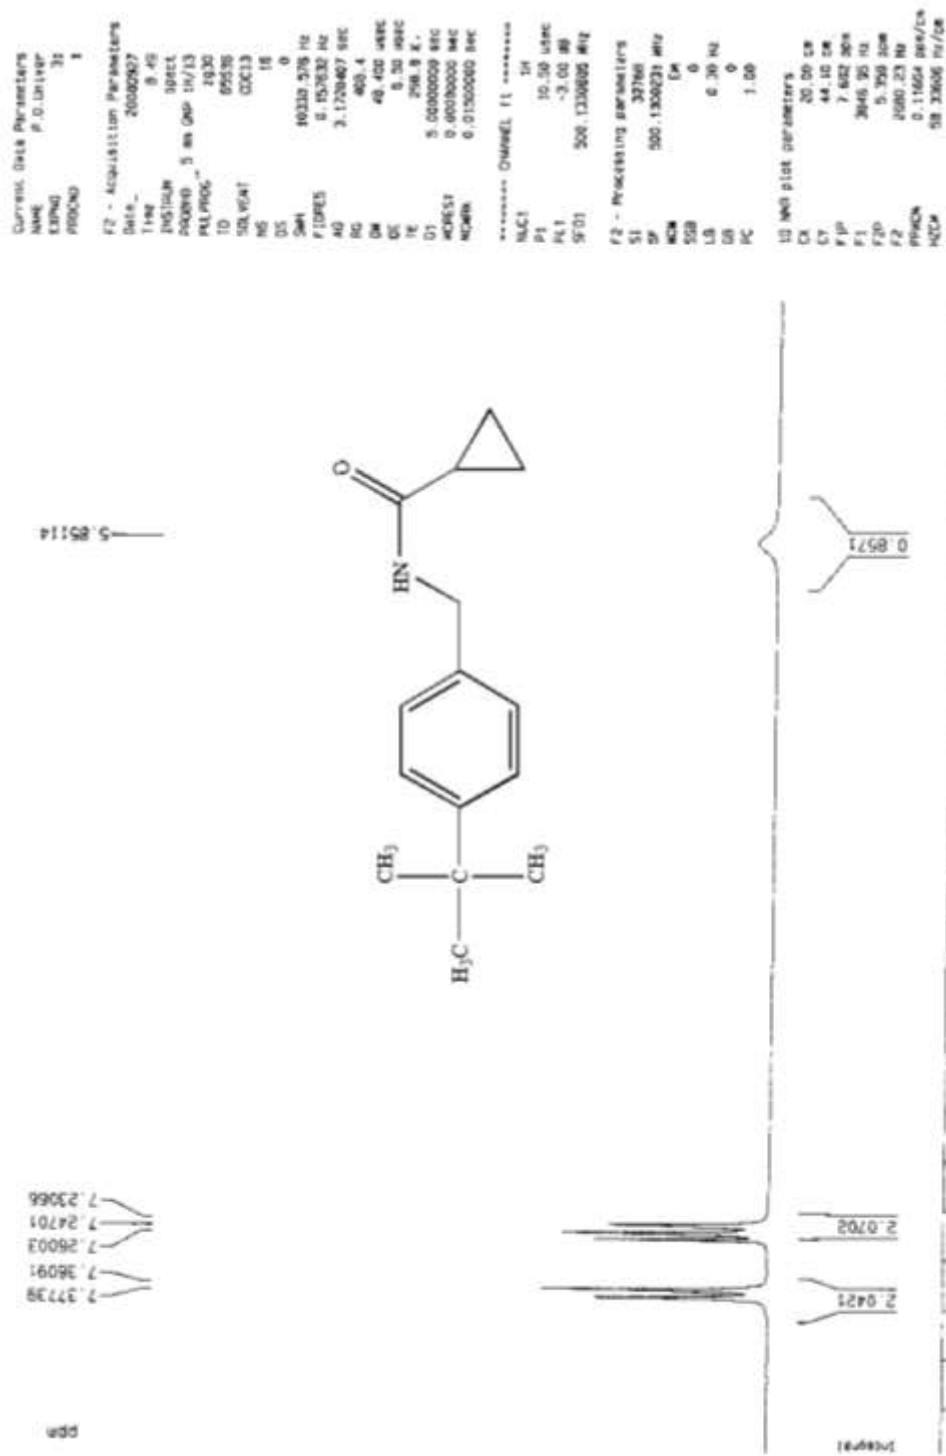

<sup>13</sup>CNMR:

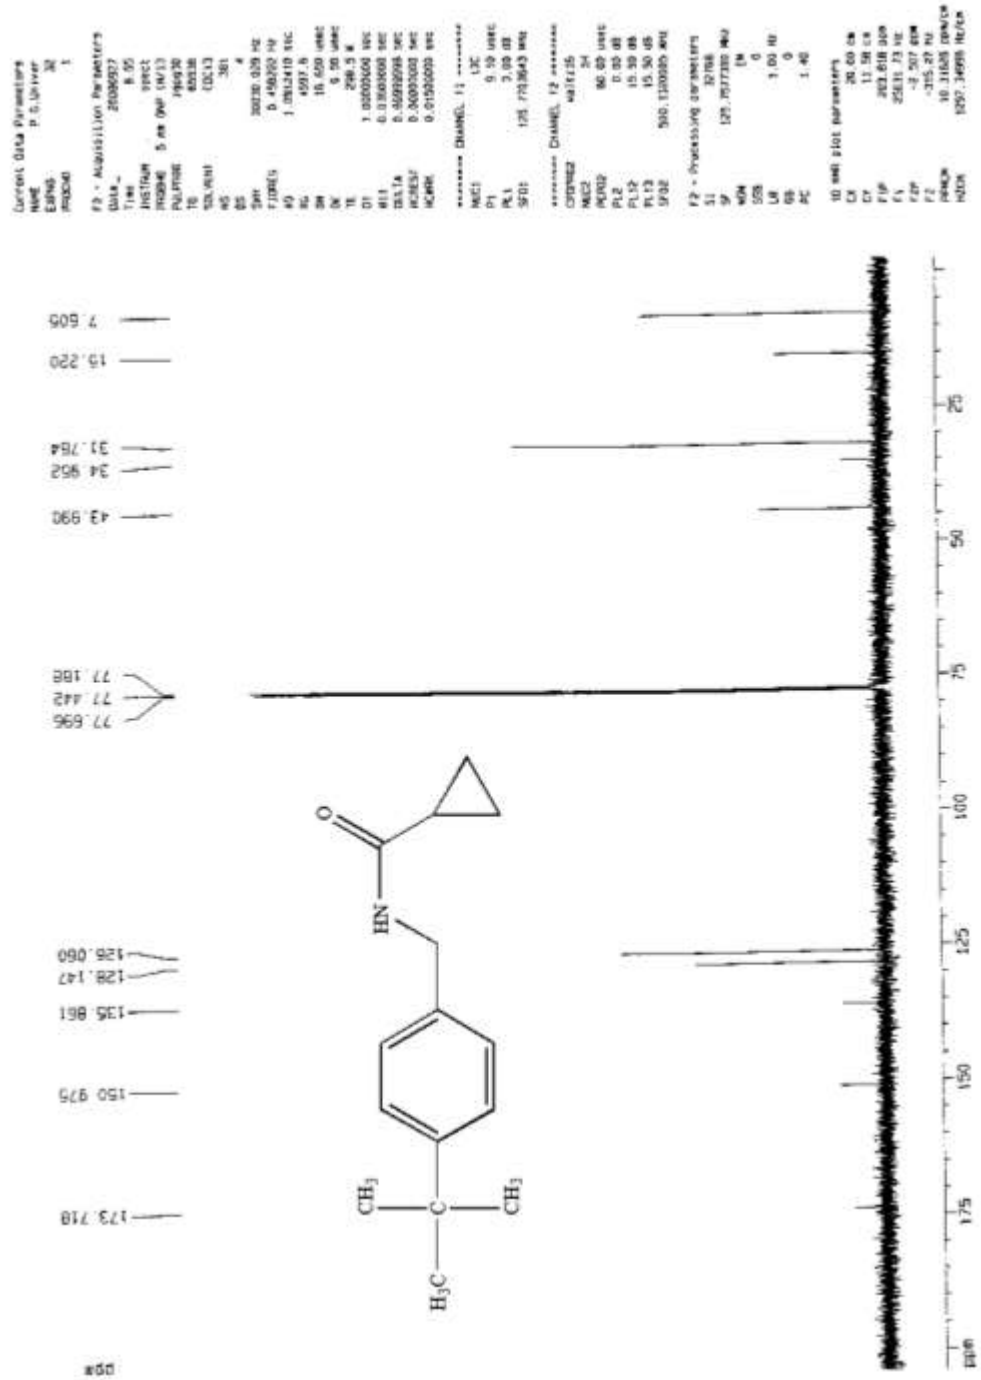

IR:

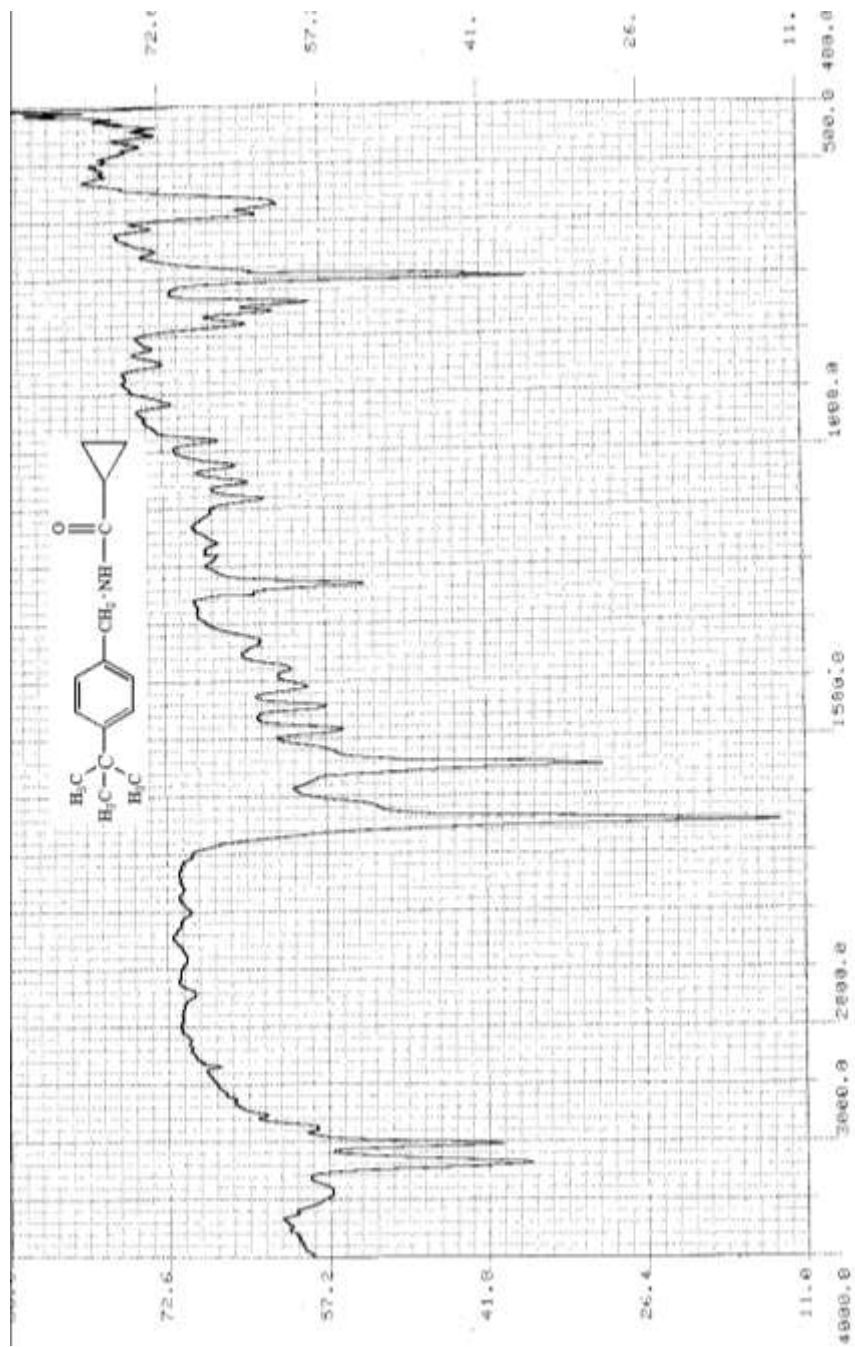

12. N-tert-butyl-2-phenylacetamide

<sup>1</sup>HNMR:

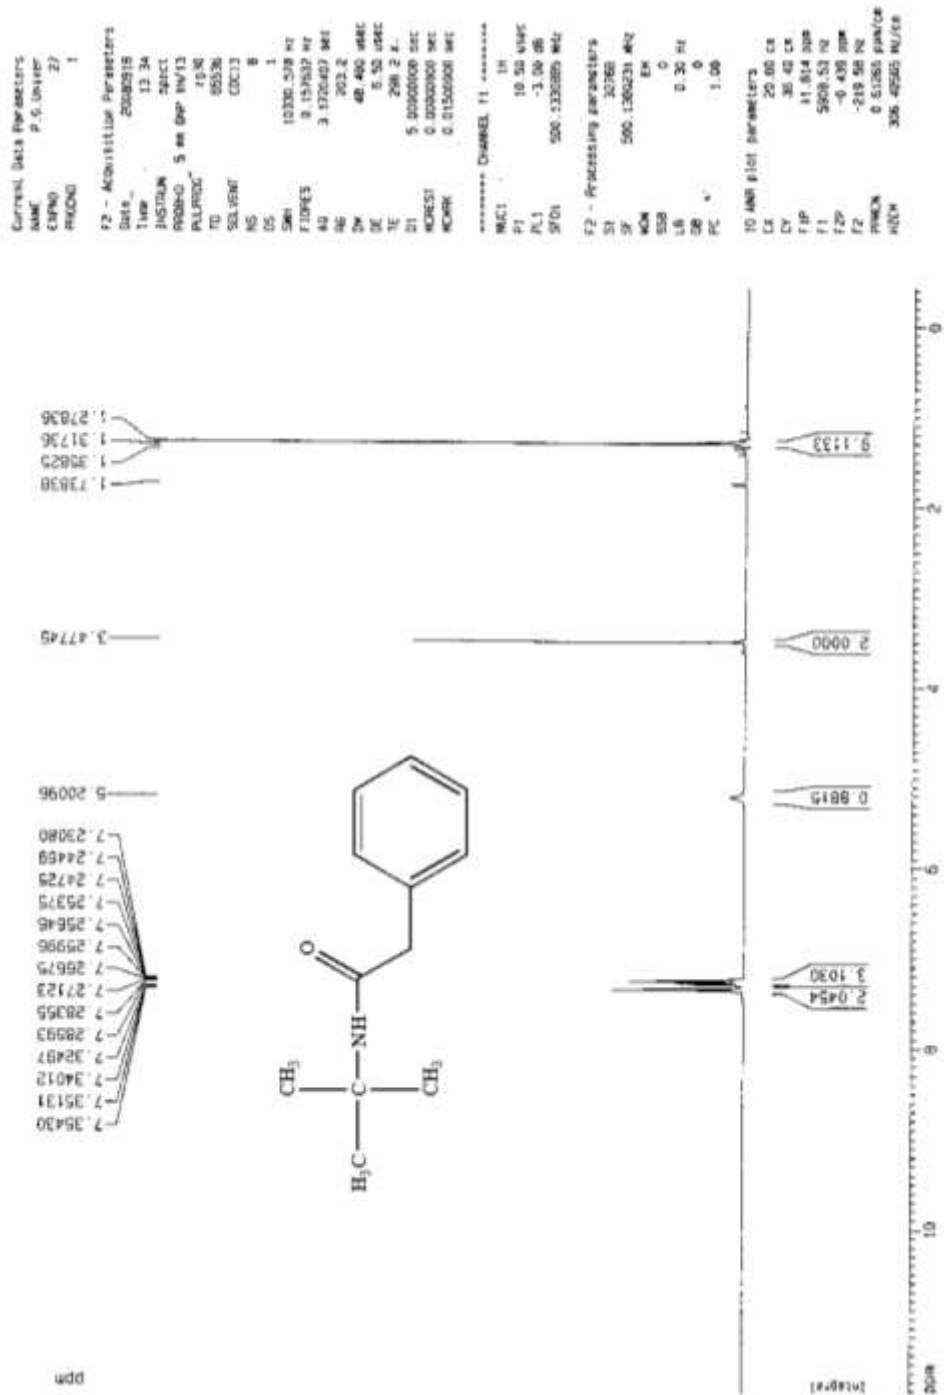

Expand:

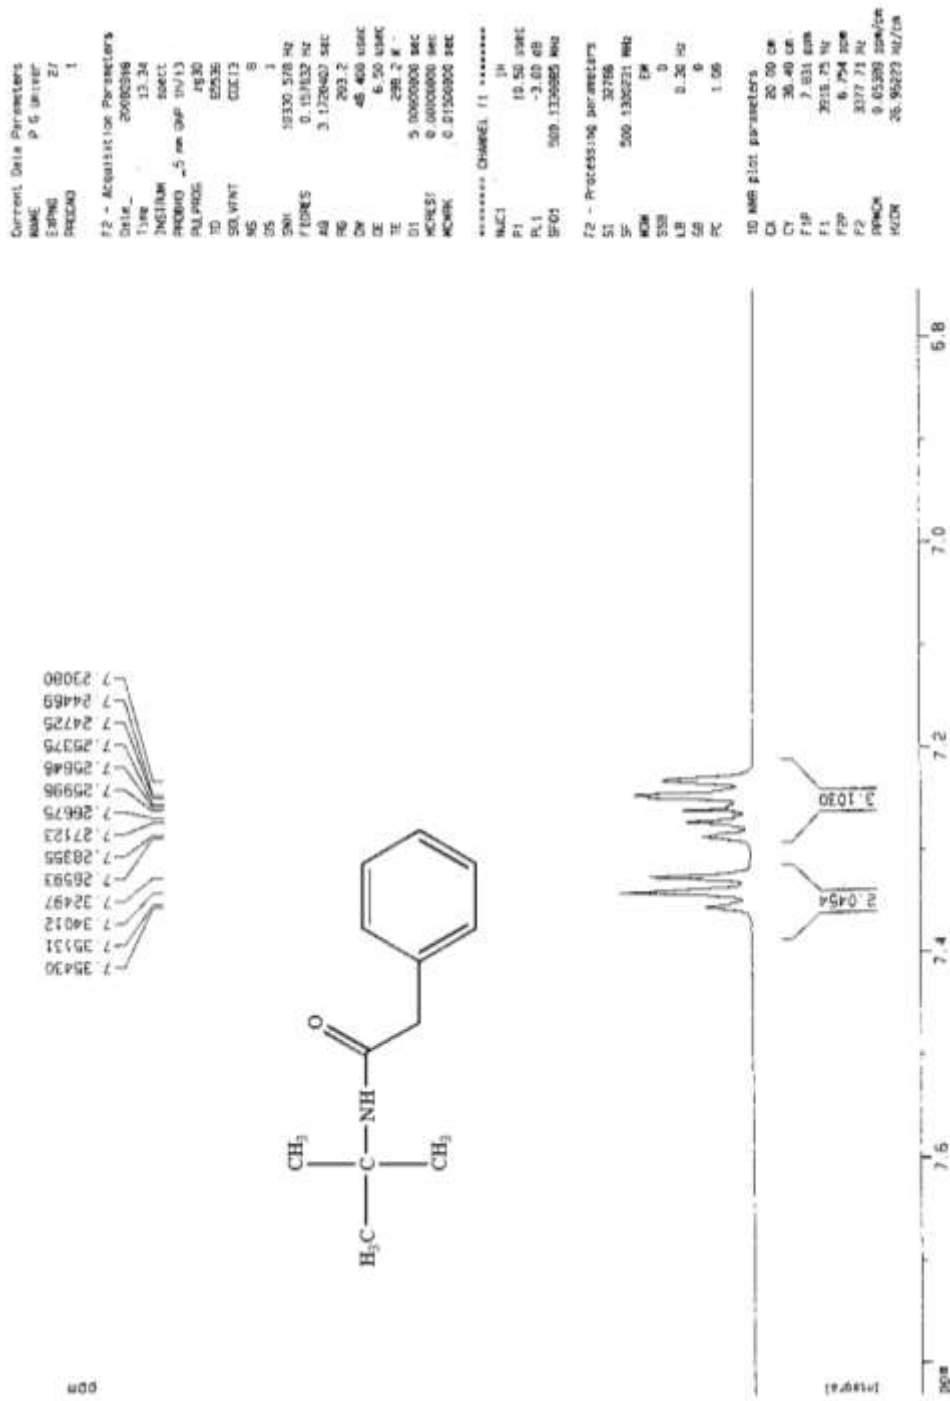

<sup>13</sup>CNMR:

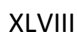



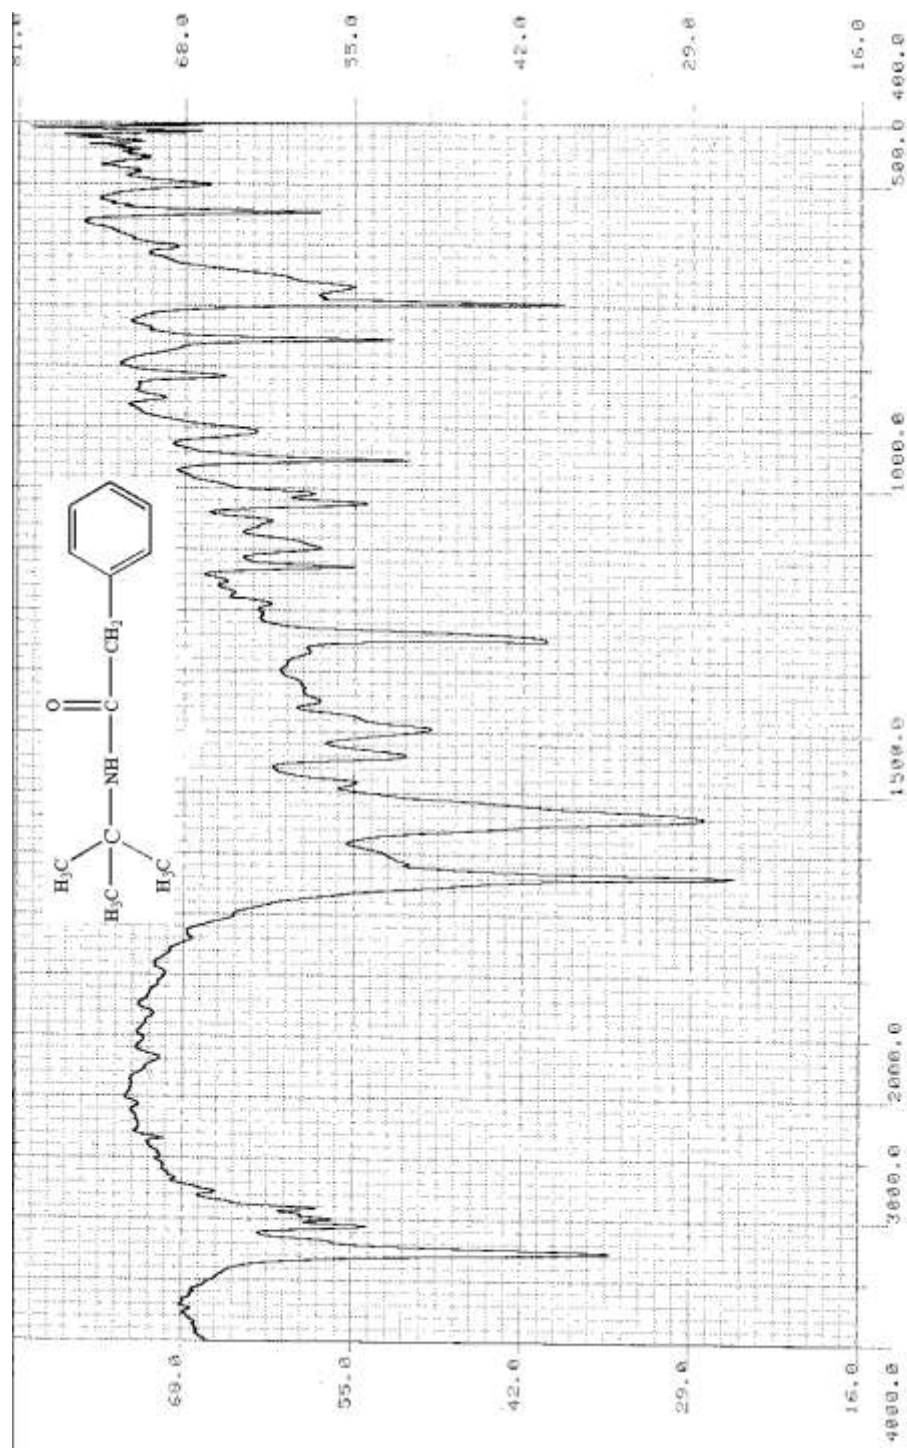

13. N-(4-fluorobenzyl) benzamide

<sup>1</sup>HNMR:

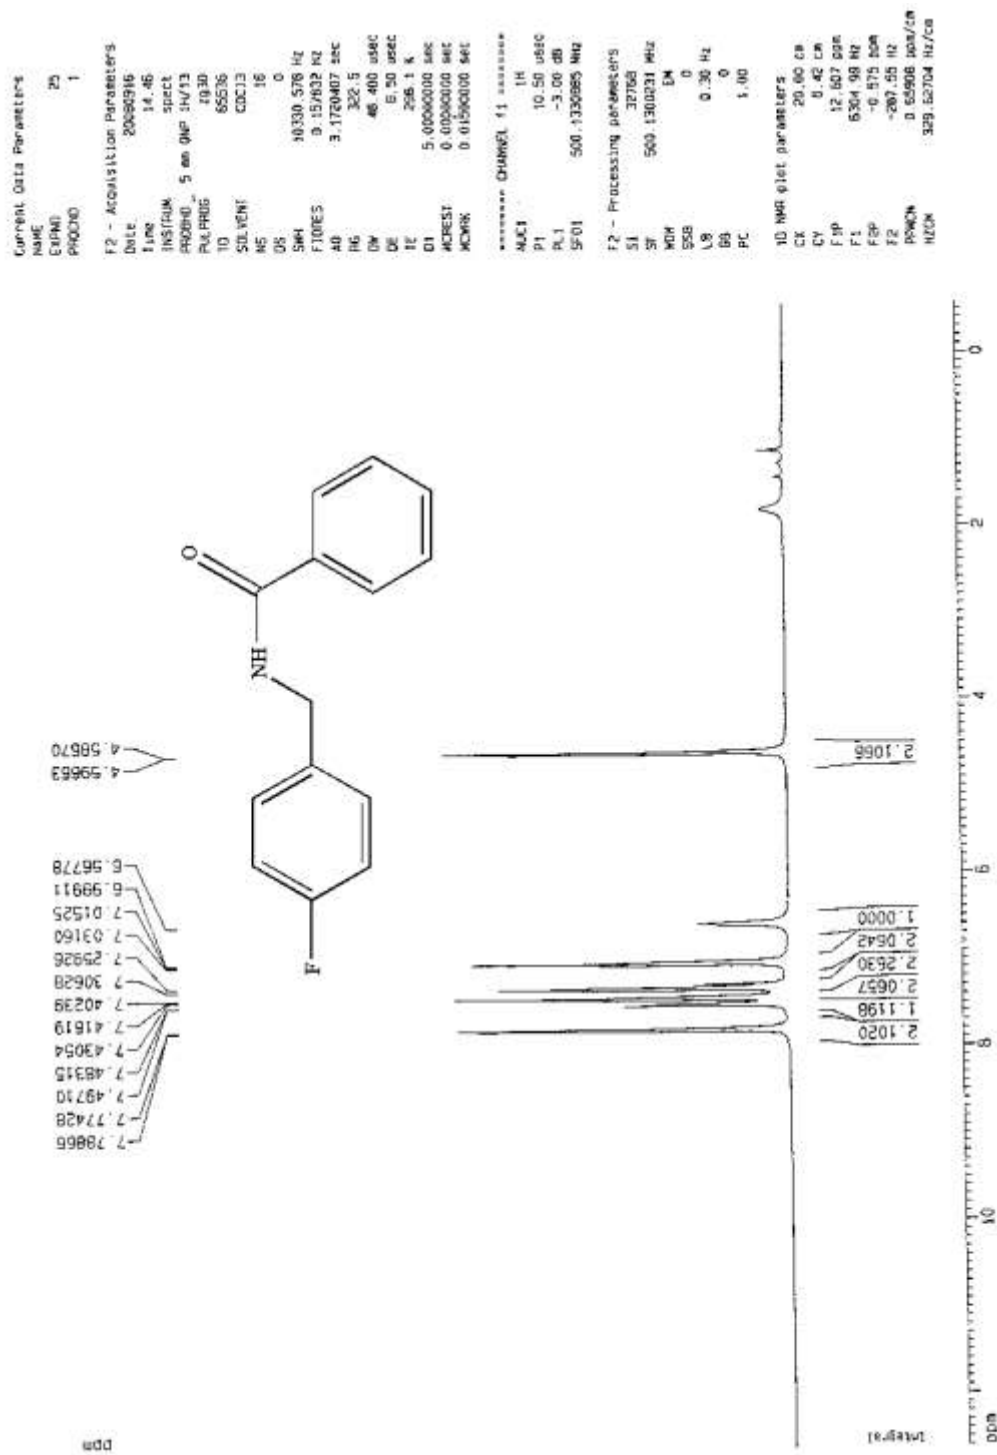



<sup>13</sup>CNMR:

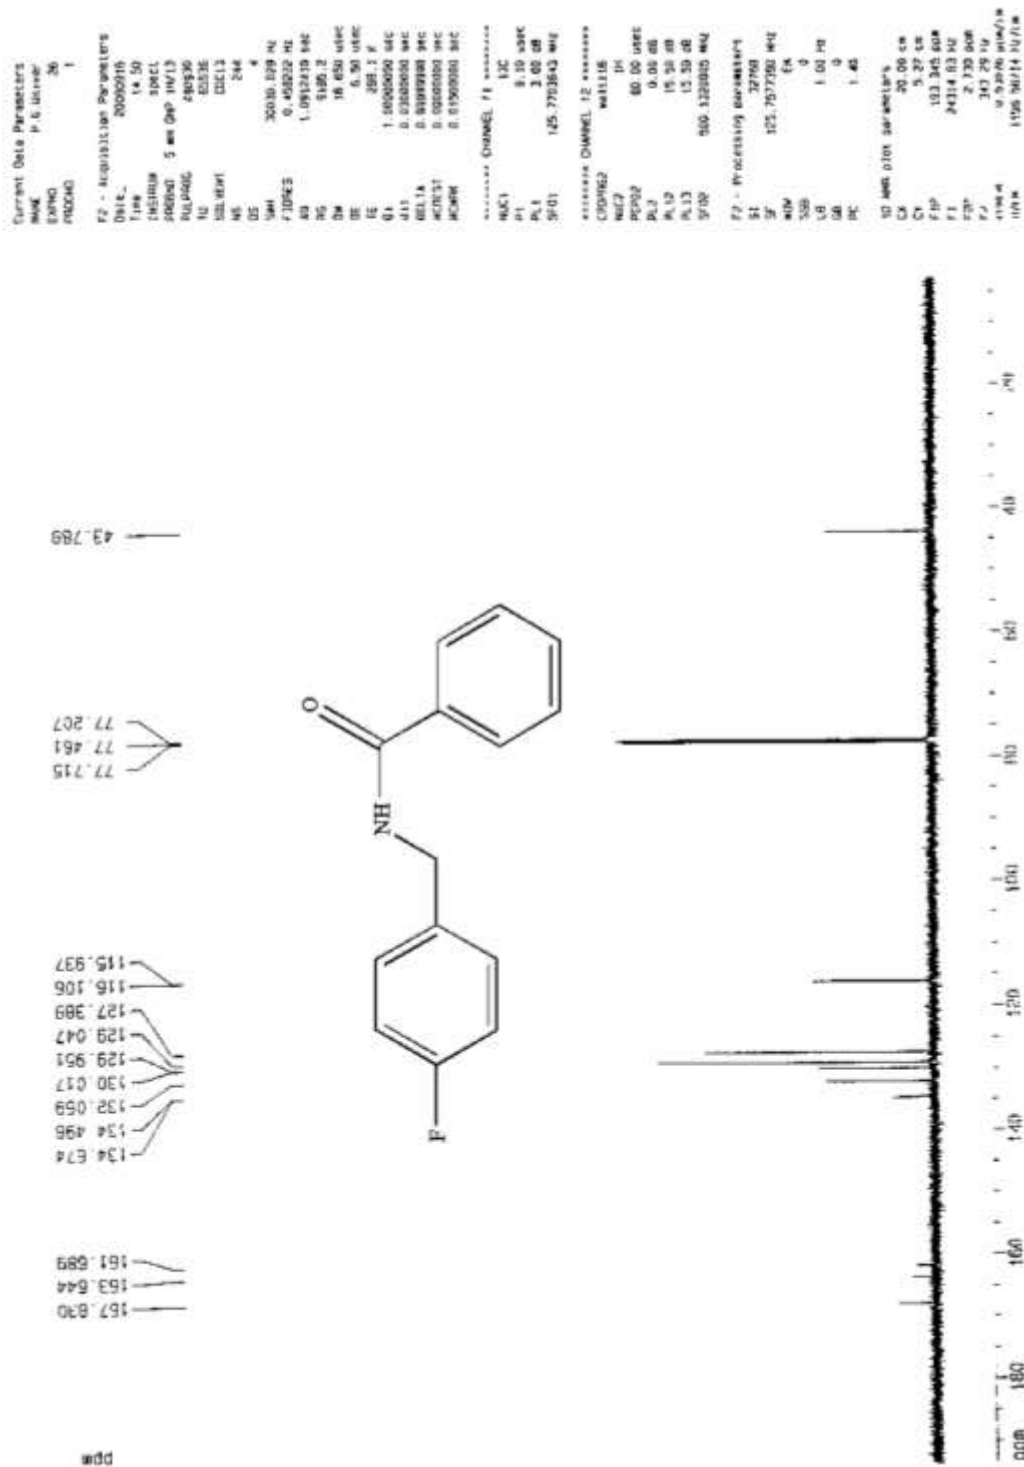

IR:

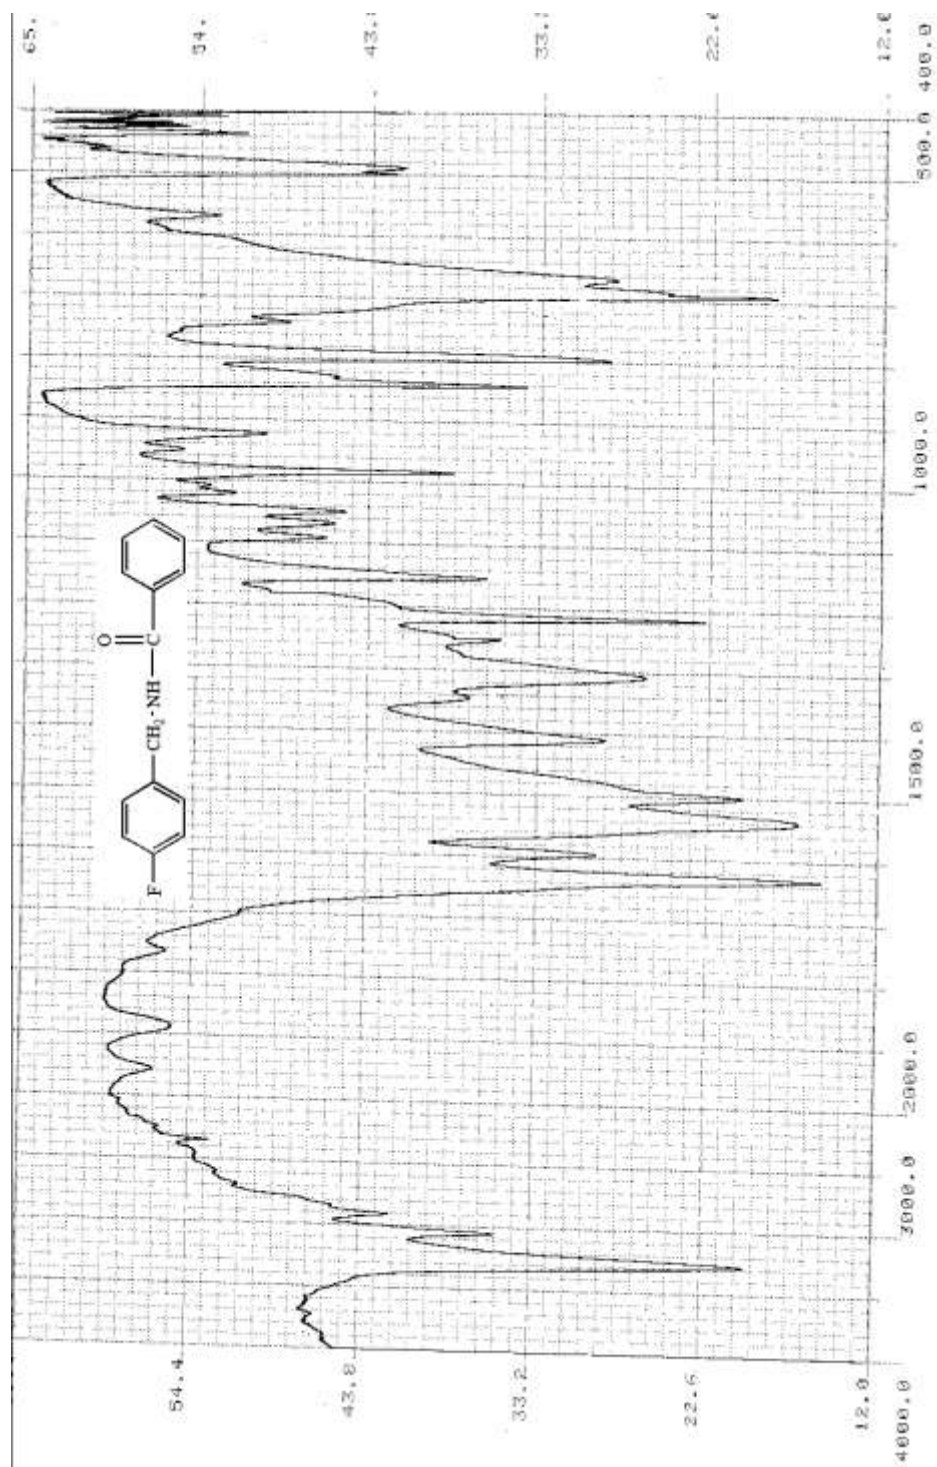

Supplement: c1jm11154j.pdf [file c1jm11154j.pdf]
